# Supplementary material for: A Network Pharmacology Analysis to Explore the Effect ofAstragali Radix-Radix Angelica Sinensison Traumatic Brain Injury
Source: Hindawi journal article supplement (doi:10.1155/2018/3951783), 2018-11-25
Supplement: f1 [file 3951783.f1.pdf]

## Supplementary Material

### A network pharmacology analysis to explore the effect of *Astragali Radix-Radix Angelica Sinensis* on traumatic brain injury

**Correspondence:** Yang Wang: wangyang\_xy87@csu.edu.cn;

Zhihua Xing: XZH\_56@163.com.

**Supplementary Table S1** Detailed information of all compounds in AR-RAS collected from the TCMSP database and literature, including 87 components of AR and 125 components of RAS.

| Herb Name              | MOL ID    | Molecule Name                                                                                                                                                             | OB (%) | DL   |
|------------------------|-----------|---------------------------------------------------------------------------------------------------------------------------------------------------------------------------|--------|------|
| <i>Astragali Radix</i> | MOL000114 | vanillic acid                                                                                                                                                             | 35.47  | 0.04 |
| <i>Astragali Radix</i> | MOL000131 | EIC                                                                                                                                                                       | 41.9   | 0.14 |
| <i>Astragali Radix</i> | MOL000211 | Mairin                                                                                                                                                                    | 55.38  | 0.78 |
| <i>Astragali Radix</i> | MOL001955 | Heriguard                                                                                                                                                                 | 11.93  | 0.33 |
| <i>Astragali Radix</i> | MOL000239 | Jaranol                                                                                                                                                                   | 50.83  | 0.29 |
| <i>Astragali Radix</i> | MOL000251 | Rhamnocitrin                                                                                                                                                              | 12.9   | 0.27 |
| <i>Astragali Radix</i> | MOL000295 | alexandrin                                                                                                                                                                | 20.63  | 0.63 |
| <i>Astragali Radix</i> | MOL000296 | hederagenin                                                                                                                                                               | 36.91  | 0.75 |
|                        |           | (3S,8S,9S,10R,13R,14S,17R)-10,1<br>3-dimethyl-17-[(2R,5S)-5-propan-2<br>-yloctan-2-yl]-2,3,4,7,8,9,11,12,14,<br>15,16,17-dodecahydro-1H-cyclope<br>nta[a]phenanthren-3-ol | 36.23  | 0.78 |
| <i>Astragali Radix</i> | MOL000354 | isorhamnetin                                                                                                                                                              | 49.6   | 0.31 |
| <i>Astragali Radix</i> | MOL000356 | lupeol                                                                                                                                                                    | 12.12  | 0.78 |
| <i>Astragali Radix</i> | MOL000371 | 3,9-di-O-methylnissolin                                                                                                                                                   | 53.74  | 0.48 |
| <i>Astragali Radix</i> | MOL000372 | 3-Hydroxy-2-picoline                                                                                                                                                      | 62.47  | 0.02 |
| <i>Astragali Radix</i> | MOL000373 | (2S)-4-methoxy-7-methyl-2-[1-met                                                                                                                                          | 5.38   | 0.81 |

|                        |           |                                                                                                                         |       |      |
|------------------------|-----------|-------------------------------------------------------------------------------------------------------------------------|-------|------|
|                        |           | hyl-1-[(2S,3R,4S,5S,6R)-3,4,5-trihydroxy-6-methylol-tetrahydropyran-2-yl]oxy-ethyl]-2,3-dihydrofuro[3,2-g]chromen-5-one |       |      |
| <i>Astragali Radix</i> | MOL000374 | 5'-hydroxyiso-muronulatol-2',5'-di-O-glucoside                                                                          | 41.72 | 0.69 |
| <i>Astragali Radix</i> | MOL000375 | 5'-hydroxyiso-muronulatol-2',5'-di-O-glucoside_qt                                                                       | 3.65  | 0.8  |
| <i>Astragali Radix</i> | MOL000376 | 7,2'-dihydroxy-3',4'-dimethoxyisoflavone-7-O-β-D-glucoside                                                              | 16.16 | 0.86 |
| <i>Astragali Radix</i> | MOL000377 | 7-hydroxy-3-(2-hydroxy-3,4-dimethoxy-phenyl)chromone                                                                    | 5.45  | 0.3  |
| <i>Astragali Radix</i> | MOL000378 | 7-O-methylisomucronulatol                                                                                               | 74.69 | 0.3  |
| <i>Astragali Radix</i> | MOL000379 | 9,10-dimethoxypterocarpan-3-O-β-D-glucoside                                                                             | 36.74 | 0.92 |
| <i>Astragali Radix</i> | MOL000380 | (6aR,11aR)-9,10-dimethoxy-6a,11a-dihydro-6H-benzofurano[3,2-c]chromen-3-ol                                              | 64.26 | 0.42 |
| <i>Astragali Radix</i> | MOL000381 | 13-hydroxy-9,11-octadecadienoic acid                                                                                    | 35.6  | 0.17 |
| <i>Astragali Radix</i> | MOL000382 | Arabinose,d                                                                                                             | 1.87  | 0.02 |
| <i>Astragali Radix</i> | MOL000383 | D-Galacturonic acid, homopolymer                                                                                        | 29.75 | 0.04 |
| <i>Astragali Radix</i> | MOL000384 | DL-Glucuronic acid                                                                                                      | 3.35  | 0.04 |
| <i>Astragali Radix</i> | MOL005928 | isoferulic acid                                                                                                         | 50.83 | 0.06 |
| <i>Astragali Radix</i> | MOL000386 | Fucopyranose, L-                                                                                                        | 42.51 | 0.03 |
| <i>Astragali Radix</i> | MOL000387 | Bifendate                                                                                                               | 31.1  | 0.67 |
| <i>Astragali Radix</i> | MOL000388 | gamma-aminobutyric acid                                                                                                 | 24.09 | 0.01 |
| <i>Astragali Radix</i> | MOL000389 | FERULIC ACID (CIS)                                                                                                      | 54.97 | 0.06 |
| <i>Astragali Radix</i> | MOL000390 | daidzein                                                                                                                | 19.44 | 0.19 |

|                        |                  |                                                      |        |      |
|------------------------|------------------|------------------------------------------------------|--------|------|
| <i>Astragali Radix</i> | <b>MOL000391</b> | Ononin                                               | 11.52  | 0.78 |
| <i>Astragali Radix</i> | <b>MOL000392</b> | formononetin                                         | 69.67  | 0.21 |
| <i>Astragali Radix</i> | <b>MOL000393</b> | Soyasaponin I                                        | 2.06   | 0.05 |
| <i>Astragali Radix</i> | <b>MOL000394</b> | choline                                              | 0.47   | 0.01 |
| <i>Astragali Radix</i> | <b>MOL000395</b> | GGB                                                  | 54.95  | 0.03 |
| <i>Astragali Radix</i> | <b>MOL000396</b> | (+)-Syringaresinol                                   | 3.29   | 0.72 |
| <i>Astragali Radix</i> | <b>MOL000397</b> | cis-p-Coumarate                                      | 45.98  | 0.04 |
| <i>Astragali Radix</i> | <b>MOL000398</b> | isoflavanone                                         | 109.99 | 0.3  |
| <i>Astragali Radix</i> | <b>MOL000399</b> | Docosanoate                                          | 15.69  | 0.26 |
| <i>Astragali Radix</i> | <b>MOL000400</b> | Flavaxin                                             | 18.18  | 0.5  |
| <i>Astragali Radix</i> | <b>MOL000401</b> | astragalosideI                                       | 46.79  | 0.11 |
| <i>Astragali Radix</i> | <b>MOL000402</b> | astragalosideI_qt                                    | 12.34  | 0.2  |
| <i>Astragali Radix</i> | <b>MOL000403</b> | astragalosideII                                      | 46.06  | 0.13 |
| <i>Astragali Radix</i> | <b>MOL000404</b> | astragalosideII_qt                                   | 11.55  | 0.25 |
| <i>Astragali Radix</i> | <b>MOL000405</b> | astragalosideIII                                     | 31.83  | 0.1  |
| <i>Astragali Radix</i> | <b>MOL000406</b> | astragalosideIII_qt                                  | 5.35   | 0.32 |
| <i>Astragali Radix</i> | <b>MOL000407</b> | astragalosideIV                                      | 22.5   | 0.15 |
| <i>Astragali Radix</i> | <b>MOL000408</b> | astragalosideIV_qt                                   | 7.07   | 0.32 |
| <i>Astragali Radix</i> | <b>MOL000409</b> | AstragalosideIV                                      | 17.74  | 0.15 |
| <i>Astragali Radix</i> | <b>MOL000410</b> | AstragalosideIV_qt                                   | 7.07   | 0.32 |
| <i>Astragali Radix</i> | <b>MOL000411</b> | Astraisoflavanin                                     | 18.37  | 0.86 |
| <i>Astragali Radix</i> | <b>MOL000412</b> | Mucronulatol                                         | 4.22   | 0.26 |
| <i>Astragali Radix</i> | <b>MOL000413</b> | astrachrysoside A                                    | 24.55  | 0.1  |
| <i>Astragali Radix</i> | <b>MOL000414</b> | Caffeate                                             | 54.97  | 0.05 |
| <i>Astragali Radix</i> | <b>MOL000415</b> | rutin                                                | 3.2    | 0.68 |
| <i>Astragali Radix</i> | <b>MOL000416</b> | Lariciresinol                                        | 5.53   | 0.38 |
| <i>Astragali Radix</i> | <b>MOL000417</b> | Calycosin                                            | 47.75  | 0.24 |
| <i>Astragali Radix</i> | <b>MOL000418</b> | 3'-Hydroxy-4'-methoxyisoflavone-7-O-beta-D-glucoside | 10.05  | 0.81 |

|                        |                  |                                                                |       |      |
|------------------------|------------------|----------------------------------------------------------------|-------|------|
| <i>Astragali Radix</i> | <b>MOL000419</b> | astrasieversianin XV                                           | 11.19 | 0.07 |
| <i>Astragali Radix</i> | <b>MOL000420</b> | XLS                                                            | 51.08 | 0.02 |
| <i>Astragali Radix</i> | <b>MOL000421</b> | nicotinic acid                                                 | 47.65 | 0.02 |
| <i>Astragali Radix</i> | <b>MOL000422</b> | kaempferol                                                     | 41.88 | 0.24 |
| <i>Astragali Radix</i> | <b>MOL000423</b> | rhamnocitrin-3-O-glucoside                                     | 2.87  | 0.76 |
| <i>Astragali Radix</i> | <b>MOL000424</b> | RAM                                                            | 50.5  | 0.04 |
| <i>Astragali Radix</i> | <b>MOL000425</b> | asernestioside A                                               | 11.07 | 0.03 |
| <i>Astragali Radix</i> | <b>MOL000426</b> | asernestioside A_qt                                            | 24.55 | 0.1  |
| <i>Astragali Radix</i> | <b>MOL000427</b> | asernestioside B                                               | 12.54 | 0.03 |
| <i>Astragali Radix</i> | <b>MOL000428</b> | asernestioside B_qt                                            | 14.03 | 0.09 |
| <i>Astragali Radix</i> | <b>MOL000429</b> | Crystal VI                                                     | 83.96 | 0.02 |
| <i>Astragali Radix</i> | <b>MOL000430</b> | betaine                                                        | 40.92 | 0.01 |
| <i>Astragali Radix</i> | <b>MOL000431</b> | coumarin                                                       | 29.17 | 0.04 |
| <i>Astragali Radix</i> | <b>MOL000432</b> | linolenic acid                                                 | 45.01 | 0.15 |
| <i>Astragali Radix</i> | <b>MOL000433</b> | FA                                                             | 68.96 | 0.71 |
| <i>Astragali Radix</i> | <b>MOL000434</b> | acetylastragaloside I                                          | 43.54 | 0.09 |
| <i>Astragali Radix</i> | <b>MOL000435</b> | acetylastragaloside I_qt                                       | 30.75 | 0.17 |
| <i>Astragali Radix</i> | <b>MOL000436</b> | (Z)-1-(2,4-dihydroxyphenyl)-3-(4-hydroxyphenyl)prop-2-en-1-one | 87.51 | 0.15 |
| <i>Astragali Radix</i> | <b>MOL000437</b> | Hirsutrin                                                      | 1.86  | 0.77 |
| <i>Astragali Radix</i> | <b>MOL000438</b> | (3R)-3-(2-hydroxy-3,4-dimethoxyphenyl)chroman-7-ol             | 67.67 | 0.26 |
| <i>Astragali Radix</i> | <b>MOL000439</b> | isomucronulatol-7,2'-di-O-glucoside                            | 49.28 | 0.62 |
| <i>Astragali Radix</i> | <b>MOL000440</b> | isomucronulatol-7,2'-di-O-glucoside_qt                         | 23.42 | 0.79 |
| <i>Astragali Radix</i> | <b>MOL000441</b> | LUPENONE                                                       | 11.66 | 0.78 |
| <i>Astragali Radix</i> | <b>MOL000442</b> | 1,7-Dihydroxy-3,9-dimethoxypterocarpene                        | 39.05 | 0.48 |

|                                |           |                   |       |      |
|--------------------------------|-----------|-------------------|-------|------|
| <i>Astragali Radix</i>         | MOL000054 | L-                | 47.64 | 0.03 |
| <i>Astragali Radix</i>         | MOL000061 | Prolinum          | 77.57 | 0.01 |
| <i>Astragali Radix</i>         | MOL000069 | palmitic acid     | 19.3  | 0.1  |
| <i>Astragali Radix</i>         | MOL000098 | quercetin         | 46.43 | 0.28 |
| <i>Radix Angelica Sinensis</i> | MOL000116 | Nonanal           | 40.28 | 0.02 |
| <i>Radix Angelica Sinensis</i> | MOL000117 | Cymol             | 27.2  | 0.02 |
| <i>Radix Angelica Sinensis</i> | MOL000121 | Decanal           | 29.81 | 0.02 |
| <i>Radix Angelica Sinensis</i> | MOL001212 | Loxanol V         | 14.19 | 0.05 |
| <i>Radix Angelica Sinensis</i> | MOL001224 | Tridecylene       | 17.69 | 0.03 |
| <i>Radix Angelica Sinensis</i> | MOL000125 | (-)-alpha-Pinene  | 46.25 | 0.05 |
| <i>Radix Angelica Sinensis</i> | MOL001273 | 80-57-9           | 50.63 | 0.06 |
| <i>Radix Angelica Sinensis</i> | MOL001302 | Usaf hc-1         | 16.23 | 0.05 |
| <i>Radix Angelica Sinensis</i> | MOL001306 | o-Acetyl-p-cresol | 24.96 | 0.03 |
| <i>Radix Angelica Sinensis</i> | MOL001314 | Azelex            | 16.9  | 0.04 |
| <i>Radix Angelica Sinensis</i> | MOL001388 | (+)-Ledol         | 16.96 | 0.12 |
| <i>Radix Angelica Sinensis</i> | MOL001578 | Hypnon            | 48.19 | 0.02 |
| <i>Radix Angelica Sinensis</i> | MOL000162 | beta-Chamigrene   | 31.99 | 0.08 |
| <i>Radix Angelica</i>          | MOL001640 | NON               | 26.74 | 0.03 |

*Sinensis*

|                                |           |                                 |       |      |
|--------------------------------|-----------|---------------------------------|-------|------|
| <i>Radix Angelica Sinensis</i> | MOL001788 | adenine                         | 62.81 | 0.03 |
| <i>Radix Angelica Sinensis</i> | MOL000197 | Myrcene                         | 24.96 | 0.02 |
| <i>Radix Angelica Sinensis</i> | MOL000199 | Safrol                          | 45.34 | 0.05 |
| <i>Radix Angelica Sinensis</i> | MOL000201 | p-Ocimene                       | 15.06 | 0.02 |
| <i>Radix Angelica Sinensis</i> | MOL000202 | Moslene                         | 33.02 | 0.02 |
| <i>Radix Angelica Sinensis</i> | MOL002029 | ()-Cuparene                     | 38.26 | 0.07 |
| <i>Radix Angelica Sinensis</i> | MOL002033 | cis-Thujopsene                  | 56.43 | 0.12 |
| <i>Radix Angelica Sinensis</i> | MOL000206 | isoeugenol                      | 70.1  | 0.04 |
| <i>Radix Angelica Sinensis</i> | MOL002098 | 3-Butylidene-7-hydroxyphthalide | 62.68 | 0.08 |
| <i>Radix Angelica Sinensis</i> | MOL002102 | Levistolid A                    | 2.15  | 0.82 |
| <i>Radix Angelica Sinensis</i> | MOL002110 | Allocymene                      | 14.89 | 0.02 |
| <i>Radix Angelica Sinensis</i> | MOL002111 | BdPh                            | 42.44 | 0.07 |
| <i>Radix Angelica Sinensis</i> | MOL002143 | senkyunolide-C                  | 46.8  | 0.08 |
| <i>Radix Angelica Sinensis</i> | MOL002144 | senkyunolide-D                  | 79.13 | 0.1  |
| <i>Radix Angelica Sinensis</i> | MOL002145 | senkyunolide-E                  | 34.4  | 0.08 |
| <i>Radix Angelica Sinensis</i> | MOL002180 | 4-Octanone                      | 19.37 | 0.01 |

*Sinensis*

|                                |           |                                                          |       |      |
|--------------------------------|-----------|----------------------------------------------------------|-------|------|
| <i>Radix Angelica Sinensis</i> | MOL002184 | (6R)-6-butylcyclohepta-1,4-diene                         | 31.69 | 0.02 |
| <i>Radix Angelica Sinensis</i> | MOL002201 | cis-ligustilide                                          | 51.3  | 0.07 |
| <i>Radix Angelica Sinensis</i> | MOL000023 | Hemo-sol                                                 | 39.84 | 0.02 |
| <i>Radix Angelica Sinensis</i> | MOL000232 | (-)-alpha-Terpineol                                      | 46.3  | 0.03 |
| <i>Radix Angelica Sinensis</i> | MOL002480 | Methylbutenol                                            | 54.58 | 0.01 |
| <i>Radix Angelica Sinensis</i> | MOL000259 | o-Thymol                                                 | 43.28 | 0.03 |
| <i>Radix Angelica Sinensis</i> | MOL000270 | CHEBI:7                                                  | 45.2  | 0.04 |
| <i>Radix Angelica Sinensis</i> | MOL002830 | PCR                                                      | 51.99 | 0.01 |
| <i>Radix Angelica Sinensis</i> | MOL002972 | (4S)-1-methyl-4-(6-methylhepta-1,5-dien-2-yl)cyclohexene | 20.3  | 0.06 |
| <i>Radix Angelica Sinensis</i> | MOL002983 | Guasol                                                   | 51.6  | 0.02 |
| <i>Radix Angelica Sinensis</i> | MOL002998 | IPH                                                      | 36.05 | 0.01 |
| <i>Radix Angelica Sinensis</i> | MOL000346 | succinic acid                                            | 29.62 | 0.01 |
| <i>Radix Angelica Sinensis</i> | MOL000035 | beta-Selinene                                            | 24.39 | 0.08 |
| <i>Radix Angelica Sinensis</i> | MOL003534 | CADINENE                                                 | 17.12 | 0.08 |
| <i>Radix Angelica Sinensis</i> | MOL000357 | Sitogluside                                              | 20.63 | 0.62 |
| <i>Radix Angelica Sinensis</i> | MOL000358 | beta-sitosterol                                          | 36.91 | 0.75 |

|                                |           |                                                                                      |       |      |
|--------------------------------|-----------|--------------------------------------------------------------------------------------|-------|------|
| <i>Sinensis</i>                |           |                                                                                      |       |      |
| <i>Radix Angelica Sinensis</i> | MOL003587 | Acoradiene                                                                           | 36.73 | 0.07 |
| <i>Radix Angelica Sinensis</i> | MOL000360 | FER                                                                                  | 39.56 | 0.06 |
| <i>Radix Angelica Sinensis</i> | MOL000383 | D-Galacturonic acid, homopolymer                                                     | 29.75 | 0.04 |
| <i>Radix Angelica Sinensis</i> | MOL000389 | FERULIC ACID (CIS)                                                                   | 54.97 | 0.06 |
| <i>Radix Angelica Sinensis</i> | MOL000040 | Scopoletol                                                                           | 27.77 | 0.08 |
| <i>Radix Angelica Sinensis</i> | MOL000421 | nicotinic acid                                                                       | 47.65 | 0.02 |
| <i>Radix Angelica Sinensis</i> | MOL004474 | Maruzen M                                                                            | 48.44 | 0.02 |
| <i>Radix Angelica Sinensis</i> | MOL004479 | o-cresol                                                                             | 62.45 | 0.02 |
| <i>Radix Angelica Sinensis</i> | MOL004613 | 6,7,3',8'-diligustilide                                                              | 9.83  | 0.7  |
| <i>Radix Angelica Sinensis</i> | MOL004723 | beta-Terpinene                                                                       | 42.29 | 0.02 |
| <i>Radix Angelica Sinensis</i> | MOL004734 | Butal                                                                                | 68.66 | 0    |
| <i>Radix Angelica Sinensis</i> | MOL000478 | Eucarvone                                                                            | 53.14 | 0.03 |
| <i>Radix Angelica Sinensis</i> | MOL000479 | Farnesene                                                                            | 17.42 | 0.05 |
| <i>Radix Angelica Sinensis</i> | MOL004791 | Ethol                                                                                | 13.32 | 0.08 |
| <i>Radix Angelica Sinensis</i> | MOL000489 | (1S,4aR,8aR)-1-isopropyl-7-methyl-4-methylene-2,3,4a,5,6,8a-hexahydro-1H-naphthalene | 19.8  | 0.08 |



|                                |           |                                                                   |       |      |
|--------------------------------|-----------|-------------------------------------------------------------------|-------|------|
| <i>Radix Angelica Sinensis</i> | MOL005125 | ANN                                                               | 29.69 | 0.03 |
| <i>Radix Angelica Sinensis</i> | MOL005449 | h-Met-h                                                           | 70.87 | 0.01 |
| <i>Radix Angelica Sinensis</i> | MOL000449 | Stigmasterol                                                      | 43.83 | 0.76 |
| <i>Radix Angelica Sinensis</i> | MOL005589 | 3,4-DIMETHYLBENZALDEHYD<br>E                                      | 39.99 | 0.02 |
| <i>Radix Angelica Sinensis</i> | MOL005590 | ETHYLBENZALDEHYDE                                                 | 40.95 | 0.02 |
| <i>Radix Angelica Sinensis</i> | MOL005608 | TMHYDROP                                                          | 54.42 | 0.03 |
| <i>Radix Angelica Sinensis</i> | MOL000635 | vanillin                                                          | 52    | 0.03 |
| <i>Radix Angelica Sinensis</i> | MOL006440 | bicycloelemene                                                    | 20.89 | 0.08 |
| <i>Radix Angelica Sinensis</i> | MOL006869 | WLN: QR CQ DV1                                                    | 36.49 | 0.03 |
| <i>Radix Angelica Sinensis</i> | MOL000069 | palmitic acid                                                     | 19.3  | 0.1  |
| <i>Radix Angelica Sinensis</i> | MOL000705 | WLN: VH6                                                          | 19.59 | 0.01 |
| <i>Radix Angelica Sinensis</i> | MOL007745 | WLN: QVR BVQ                                                      | 17.74 | 0.04 |
| <i>Radix Angelica Sinensis</i> | MOL008244 | (1R,2S,4R)-1-ethyl-1-methyl-2,4-bi<br>s(1-methylethyl)cyclohexane | 15.01 | 0.06 |
| <i>Radix Angelica Sinensis</i> | MOL008245 | DODECENE                                                          | 17.74 | 0.02 |
| <i>Radix Angelica Sinensis</i> | MOL008246 | phosphatdic acid                                                  | 19.32 | 0.05 |
| <i>Radix Angelica Sinensis</i> | MOL008247 | L-beta,gamma-Dimyristoyl-alpha-c                                  | 20.69 | 0.47 |

|                                |           |                                                                                               |       |      |
|--------------------------------|-----------|-----------------------------------------------------------------------------------------------|-------|------|
|                                |           | ephalin                                                                                       |       |      |
| <i>Radix Angelica Sinensis</i> | MOL008248 | phosphatidylinositol                                                                          | 4.63  | 0.29 |
| <i>Radix Angelica Sinensis</i> | MOL008249 | phosphatidylinositol_qt                                                                       | 12.66 | 0.05 |
| <i>Radix Angelica Sinensis</i> | MOL008250 | ESEN                                                                                          | 47.31 | 0.04 |
| <i>Radix Angelica Sinensis</i> | MOL008251 | sedanolide                                                                                    | 62.46 | 0.07 |
| <i>Radix Angelica Sinensis</i> | MOL008252 | senkyunolide                                                                                  | 68.28 | 0.07 |
| <i>Radix Angelica Sinensis</i> | MOL008253 | sphingomyelin                                                                                 | 0.31  | 0.51 |
| <i>Radix Angelica Sinensis</i> | MOL008254 | Isotetandrine                                                                                 | 10.42 | 0.1  |
| <i>Radix Angelica Sinensis</i> | MOL008255 | $\alpha$ -acoradiene                                                                          | 40.98 | 0.07 |
| <i>Radix Angelica Sinensis</i> | MOL008256 | InChI=1/C15H24/c1-10-7-8-15-9-1<br>2(10)14(3,4)13(15)6-5-11(15)2/h7,<br>11-13H,5-6,8-9H2,1-4H | 55.56 | 0.1  |
| <i>Radix Angelica Sinensis</i> | MOL008257 | $\alpha$ -copaene                                                                             | 29.33 | 0.12 |
| <i>Radix Angelica Sinensis</i> | MOL008258 | (1R,4R,5S)-4-isopropenyl-1,8-dime<br>thylspiro[4.5]dec-8-ene                                  | 40.65 | 0.07 |
| <i>Radix Angelica Sinensis</i> | MOL008259 | 2,6-di(phenyl)thiopyran-4-thione                                                              | 69.13 | 0.15 |
| <i>Radix Angelica Sinensis</i> | MOL008260 | o-Xylenol                                                                                     | 53.13 | 0.02 |
| <i>Radix Angelica Sinensis</i> | MOL008261 | 2,4,6-trimethyl-Octane                                                                        | 29.14 | 0.02 |
| <i>Radix Angelica Sinensis</i> | MOL008262 | Mesitaldehyde                                                                                 | 37.8  | 0.03 |

|                                |           |                                                                     |       |      |
|--------------------------------|-----------|---------------------------------------------------------------------|-------|------|
| <i>Radix Angelica Sinensis</i> | MOL008263 | Isoxylaldehyde                                                      | 38.85 | 0.02 |
| <i>Radix Angelica Sinensis</i> | MOL008264 | (E)-octadec-3-ene                                                   | 19.5  | 0.09 |
| <i>Radix Angelica Sinensis</i> | MOL008265 | 2-valerylbenzoic acid                                               | 78.26 | 0.06 |
| <i>Radix Angelica Sinensis</i> | MOL008266 | (Z)-2-Hexenyl hexanoate                                             | 19.39 | 0.04 |
| <i>Radix Angelica Sinensis</i> | MOL008267 | 2-Methylhexadecanoic acid                                           | 20.23 | 0.11 |
| <i>Radix Angelica Sinensis</i> | MOL008268 | cis-Isoeugenol                                                      | 20.73 | 0.04 |
| <i>Radix Angelica Sinensis</i> | MOL008269 | 2-methyl-5-decanone                                                 | 20.4  | 0.11 |
| <i>Radix Angelica Sinensis</i> | MOL008270 | 2-methyldodecan-5-one                                               | 13.16 | 0.04 |
| <i>Radix Angelica Sinensis</i> | MOL008271 | 3,7-dimethyl-nonane                                                 | 16.97 | 0.02 |
| <i>Radix Angelica Sinensis</i> | MOL008272 | 1,1,5-trimethyl-2-formylcyclohexa-2,5-diene-4-one                   | 48.94 | 0.04 |
| <i>Radix Angelica Sinensis</i> | MOL008273 | 4-Methyl-6-hepten-3-one                                             | 78.38 | 0.01 |
| <i>Radix Angelica Sinensis</i> | MOL008274 | 6-Ethylresorcinol                                                   | 46.45 | 0.03 |
| <i>Radix Angelica Sinensis</i> | MOL008275 | 5-Indolol                                                           | 63.14 | 0.03 |
| <i>Radix Angelica Sinensis</i> | MOL008276 | Undecanol-6                                                         | 25.77 | 0.02 |
| <i>Radix Angelica Sinensis</i> | MOL008277 | 7,10-PENTADECADIYNOIC ACID                                          | 41.5  | 0.09 |
| <i>Radix Angelica Sinensis</i> | MOL008278 | 4-chloro-N-[1-methyl-5-[[1-methyl-5-[[1-methyl-5-(2-morpholinoethyl | 7.18  | 0.31 |

|                                    |           |                                                                                                                                     |       |      |
|------------------------------------|-----------|-------------------------------------------------------------------------------------------------------------------------------------|-------|------|
|                                    |           | carbamoyl)pyrrol-3-yl]carbamoyl]p<br>yrrol-3-yl]carbamoyl]pyrrol-3-yl]-5<br>-[2-(2-pyridyl)ethylamino]isothiazo<br>le-3-carboxamide |       |      |
| <i>Radix Angelica<br/>Sinensis</i> | MOL008279 | Amyl ketone                                                                                                                         | 18.65 | 0.02 |
| <i>Radix Angelica<br/>Sinensis</i> | MOL008280 | Isoamylbenzene                                                                                                                      | 35.69 | 0.03 |
| <i>Radix Angelica<br/>Sinensis</i> | MOL008281 | (Z)-2-[[ (Z)-2-methylbut-2-enoyl]ox<br>ymethyl]but-2-enoic acid                                                                     | 77.1  | 0.04 |
| <i>Radix Angelica<br/>Sinensis</i> | MOL008282 | Tropone                                                                                                                             | 47.41 | 0.01 |
| <i>Radix Angelica<br/>Sinensis</i> | MOL008283 | aromadendrene                                                                                                                       | 18.21 | 0.1  |
| <i>Radix Angelica<br/>Sinensis</i> | MOL008284 | BUA                                                                                                                                 | 21.62 | 0    |
| <i>Radix Angelica<br/>Sinensis</i> | MOL008285 | (3S)-3-butyl-3H-isobenzofuran-1-o<br>ne                                                                                             | 55.05 | 0.07 |
| <i>Radix Angelica<br/>Sinensis</i> | MOL008286 | (-)-Camphoric acid                                                                                                                  | 99.13 | 0.07 |
| <i>Radix Angelica<br/>Sinensis</i> | MOL008287 | (3E)-3-butyldiene-7-hydroxy-2-ben<br>zofuran-1-one                                                                                  | 42.17 | 0.08 |
| <i>Radix Angelica<br/>Sinensis</i> | MOL008288 | Coniferyl ferulate                                                                                                                  | 4.54  | 0.39 |
| <i>Radix Angelica<br/>Sinensis</i> | MOL008290 | lecithin                                                                                                                            | 0.31  | 0.4  |
| <i>Radix Angelica<br/>Sinensis</i> | MOL008291 | 2,4-Xylylaldehyde                                                                                                                   | 39.33 | 0.03 |
| <i>Radix Angelica<br/>Sinensis</i> | MOL008292 | m-Ethylphenol                                                                                                                       | 51.3  | 0.02 |
| <i>Radix Angelica</i>              | MOL008293 | 1,5,5,6-tetramethyl-1,3-Cyclohexad                                                                                                  | 39.22 | 0.03 |

|                                |           |             |       |      |
|--------------------------------|-----------|-------------|-------|------|
| <i>Sinensis</i>                |           | iene        |       |      |
| <i>Radix Angelica Sinensis</i> | MOL000885 | Dodekan     | 17.74 | 0.02 |
| <i>Radix Angelica Sinensis</i> | MOL000967 | bergamotene | 28.51 | 0.09 |
| <i>Radix Angelica Sinensis</i> | MOL000974 | cuminal     | 38.29 | 0.03 |

**Supplementary Table S2** 19 compounds and 226 target proteins of AR-RAS.

| Ingredients                      | Related Targets                                      | Gene names |
|----------------------------------|------------------------------------------------------|------------|
| <i>7-O-Methylisomucronulatol</i> | Nitric oxide synthase, inducible                     | NOS2       |
| <i>7-O-Methylisomucronulatol</i> | Prostaglandin G/H synthase 1                         | PTGS1      |
| <i>7-O-Methylisomucronulatol</i> | Dopamine D1 receptor                                 | DRD1       |
| <i>7-O-Methylisomucronulatol</i> | Muscarinic acetylcholine receptor M3                 | CHRM3      |
| <i>7-O-Methylisomucronulatol</i> | Thrombin                                             | F2         |
| <i>7-O-Methylisomucronulatol</i> | Potassium voltage-gated channel subfamily H member 2 | KCNH2      |
| <i>7-O-Methylisomucronulatol</i> | Muscarinic acetylcholine receptor M1                 | CHRM1      |
| <i>7-O-Methylisomucronulatol</i> | Estrogen receptor                                    | ESR1       |
| <i>7-O-Methylisomucronulatol</i> | Androgen receptor                                    | AR         |
| <i>7-O-Methylisomucronulatol</i> | Beta-1 adrenergic receptor                           | ADRB1      |
| <i>7-O-Methylisomucronulatol</i> | Sodium channel protein type 5 subunit alpha          | SCN5A      |
| <i>7-O-Methylisomucronulatol</i> | Peroxisome proliferator activated receptor gamma     | PPARG      |
| <i>7-O-Methylisomucronulatol</i> | Coagulation factor Xa                                | F10        |
| <i>7-O-Methylisomucronulatol</i> | Muscarinic acetylcholine receptor M5                 | CHRM5      |

---

|                                  |                                                     |        |
|----------------------------------|-----------------------------------------------------|--------|
| <i>7-O-Methylisomucronulatol</i> | Prostaglandin G/H synthase 2                        | PTGS2  |
| <i>7-O-Methylisomucronulatol</i> | Nitric-oxide synthase, endothelial                  | NOS3   |
| <i>7-O-Methylisomucronulatol</i> | Alpha-2C adrenergic receptor                        | ADRA2C |
| <i>7-O-Methylisomucronulatol</i> | Muscarinic acetylcholine<br>receptor M4             | CHRM4  |
| <i>7-O-Methylisomucronulatol</i> | Retinoic acid receptor<br>RXR-alpha                 | RXRA   |
| <i>7-O-Methylisomucronulatol</i> | Delta-type opioid receptor                          | OPRD1  |
| <i>7-O-Methylisomucronulatol</i> | CGMP-inhibited 3',5'-cyclic<br>phosphodiesterase A  | PDE3A  |
| <i>7-O-Methylisomucronulatol</i> | 5-hydroxytryptamine 2A receptor                     | HTR2A  |
| <i>7-O-Methylisomucronulatol</i> | Alpha-1A adrenergic receptor                        | ADRA1A |
| <i>7-O-Methylisomucronulatol</i> | Muscarinic acetylcholine<br>receptor M2             | CHRM2  |
| <i>7-O-Methylisomucronulatol</i> | Alpha-1B adrenergic receptor                        | ADRA1B |
| <i>7-O-Methylisomucronulatol</i> | Sodium-dependent dopamine<br>transporter            | SLC6A3 |
| <i>7-O-Methylisomucronulatol</i> | Beta-2 adrenergic receptor                          | ADRB2  |
| <i>7-O-Methylisomucronulatol</i> | Alpha-1D adrenergic receptor                        | ADRA1D |
| <i>7-O-Methylisomucronulatol</i> | Sodium-dependent serotonin<br>transporter           | SLC6A4 |
| <i>7-O-Methylisomucronulatol</i> | Estrogen receptor beta                              | ESRRB  |
| <i>7-O-Methylisomucronulatol</i> | Gamma-aminobutyric acid<br>receptor subunit alpha-1 | GABRA1 |
| <i>7-O-Methylisomucronulatol</i> | Dipeptidyl peptidase IV                             | DPP4   |
| <i>7-O-Methylisomucronulatol</i> | Mitogen-activated protein kinase<br>14              | MAPK14 |
| <i>7-O-Methylisomucronulatol</i> | Glycogen synthase kinase-3 beta                     | GSK3B  |
| <i>7-O-Methylisomucronulatol</i> | Heat shock protein HSP 90                           | HSP 90 |

---

|                                  |                                                        |        |
|----------------------------------|--------------------------------------------------------|--------|
| <i>7-O-Methylisomucronulatol</i> | Cell division protein kinase 2                         | CDK2   |
| <i>7-O-Methylisomucronulatol</i> | Serine/threonine-protein kinase<br>Chk1                | CHEK1  |
| <i>7-O-Methylisomucronulatol</i> | mRNA of PKA Catalytic Subunit<br>C-alpha               | PRKACA |
| <i>7-O-Methylisomucronulatol</i> | Retinoic acid receptor RXR-beta                        | RXRB   |
| <i>7-O-Methylisomucronulatol</i> | Trypsin-1<br>Proto-oncogene                            | PRSS1  |
| <i>7-O-Methylisomucronulatol</i> | serine/threonine-protein kinase<br>Pim-1               | PIM1   |
| <i>7-O-Methylisomucronulatol</i> | Cyclin-A2                                              | CCNA2  |
| <i>7-O-Methylisomucronulatol</i> | Nuclear receptor coactivator 2                         | NCOA2  |
| <i>7-O-Methylisomucronulatol</i> | Calcium-activated potassium<br>channel subunit alpha 1 | KCNMA1 |
| <i>7-O-Methylisomucronulatol</i> | Calmodulin                                             | CALM   |
| <i>Formononetin</i>              | Nitric oxide synthase, inducible                       | NOS2   |
| <i>Formononetin</i>              | Prostaglandin G/H synthase 1                           | PTGS1  |
| <i>Formononetin</i>              | Muscarinic acetylcholine<br>receptor M1                | CHRM1  |
| <i>Formononetin</i>              | Estrogen receptor                                      | ESR2   |
| <i>Formononetin</i>              | Androgen receptor                                      | AR     |
| <i>Formononetin</i>              | Peroxisome proliferator activated<br>receptor gamma    | PPARG  |
| <i>Formononetin</i>              | Prostaglandin G/H synthase 2                           | PTGS2  |
| <i>Formononetin</i>              | Retinoic acid receptor<br>RXR-alpha                    | RXRA   |
| <i>Formononetin</i>              | CGMP-inhibited 3',5'-cyclic<br>phosphodiesterase A     | PDE3A  |
| <i>Formononetin</i>              | Alpha-1A adrenergic receptor                           | ADRA1A |

---

|                     |                                                      |        |
|---------------------|------------------------------------------------------|--------|
| <i>Formononetin</i> | Sodium-dependent dopamine transporter                | SLC6A3 |
| <i>Formononetin</i> | Beta-2 adrenergic receptor                           | ADRB2  |
| <i>Formononetin</i> | Sodium-dependent serotonin transporter               | SLC6A4 |
| <i>Formononetin</i> | Estrogen receptor beta                               | MAOB   |
| <i>Formononetin</i> | Dipeptidyl peptidase IV                              | DPP4   |
| <i>Formononetin</i> | Mitogen-activated protein kinase 14                  | MAPK14 |
| <i>Formononetin</i> | Glycogen synthase kinase-3 beta                      | GSK3B  |
| <i>Formononetin</i> | Heat shock protein HSP 90                            | HSP90  |
| <i>Formononetin</i> | Cell division protein kinase 2                       | CDK2   |
| <i>Formononetin</i> | Amine oxidase [flavin-containing] B                  | PKIA   |
| <i>Formononetin</i> | Serine/threonine-protein kinase Chk1                 | CHEK1  |
| <i>Formononetin</i> | mRNA of PKA Catalytic Subunit C-alpha                | PRKACA |
| <i>Formononetin</i> | Trypsin-1                                            | PRSS1  |
| <i>Formononetin</i> | Proto-oncogene serine/threonine-protein kinase Pim-1 | PIM1   |
| <i>Formononetin</i> | Cyclin-A2                                            | CCNA2  |
| <i>Formononetin</i> | Calmodulin                                           | CALM   |
| <i>Formononetin</i> | cAMP-dependent protein kinase inhibitor alpha        | ACHE   |
| <i>Formononetin</i> | Thrombin                                             | F2     |
| <i>Formononetin</i> | Nitric-oxide synthase, endothelial                   | NOS3   |
| <i>Formononetin</i> | Acetylcholinesterase                                 | LACTB2 |

---



|                                                                                             |                                                                        |         |
|---------------------------------------------------------------------------------------------|------------------------------------------------------------------------|---------|
| <i>Formononetin</i>                                                                         | Beta-lactamase                                                         | JUN     |
| <i>Formononetin</i>                                                                         | Transcription factor AP-1                                              | IL4     |
| <i>Formononetin</i>                                                                         | Peroxisome proliferator-activated<br>receptor gamma                    | PPARG   |
| <i>Formononetin</i>                                                                         | Interleukin-4                                                          | SIRT1   |
| <i>Formononetin</i>                                                                         | NAD-dependent deacetylase<br>sirtuin-1                                 | ATP5F1B |
| <i>Formononetin</i>                                                                         | ATP synthase subunit beta,<br>mitochondrial                            | MT-ND6  |
| <i>Formononetin</i>                                                                         | NADH-ubiquinone<br>oxidoreductase chain 6                              | HSD3B2  |
| <i>Formononetin</i>                                                                         | 3 beta-hydroxysteroid<br>dehydrogenase/Delta                           | HSD3B1  |
| <i>Formononetin</i>                                                                         | 5-->4-isomerase type 2<br>3 beta-hydroxysteroid<br>dehydrogenase/Delta | HTR3A   |
| <i>FA</i>                                                                                   | 5-->4-isomerase type 1                                                 |         |
| <i>FA</i>                                                                                   | Cell division protein kinase 2                                         | CDK2    |
| <i>FA</i>                                                                                   | Thrombin                                                               | F2      |
| <i>FA</i>                                                                                   | Glycogen synthase kinase-3 beta                                        | GSK3B   |
| <i>(6aR,11aR)-9,10-dimethoxy-6a,<br/>11a-dihydro-6H-benzofurano[3,<br/>2-c]chromen-3-ol</i> | Nitric oxide synthase, inducible                                       | NOS2    |
| <i>(6aR,11aR)-9,10-dimethoxy-6a,<br/>11a-dihydro-6H-benzofurano[3,<br/>2-c]chromen-3-ol</i> | Prostaglandin G/H synthase 1                                           | PTGS1   |
| <i>(6aR,11aR)-9,10-dimethoxy-6a,<br/>11a-dihydro-6H-benzofurano[3,<br/>2-c]chromen-3-ol</i> | Muscarinic acetylcholine<br>receptor M3                                | CHRNA7  |

---

|                                                                                                           |                                                |        |
|-----------------------------------------------------------------------------------------------------------|------------------------------------------------|--------|
| <i>(6aR,11aR)</i> -9,10-dimethoxy-6a,<br><i>11a-dihydro-6H-benzofurano</i> [3,<br><i>2-c]chromen-3-ol</i> | Thrombin                                       | F2     |
| <i>(6aR,11aR)</i> -9,10-dimethoxy-6a,<br><i>11a-dihydro-6H-benzofurano</i> [3,<br><i>2-c]chromen-3-ol</i> | Muscarinic acetylcholine<br>receptor M1        | CHRM1  |
| <i>(6aR,11aR)</i> -9,10-dimethoxy-6a,<br><i>11a-dihydro-6H-benzofurano</i> [3,<br><i>2-c]chromen-3-ol</i> | Estrogen receptor                              | ESR1   |
| <i>(6aR,11aR)</i> -9,10-dimethoxy-6a,<br><i>11a-dihydro-6H-benzofurano</i> [3,<br><i>2-c]chromen-3-ol</i> | Sodium channel protein type 5<br>subunit alpha | SCN5A  |
| <i>(6aR,11aR)</i> -9,10-dimethoxy-6a,<br><i>11a-dihydro-6H-benzofurano</i> [3,<br><i>2-c]chromen-3-ol</i> | Prostaglandin G/H synthase 2                   | PTGS2  |
| <i>(6aR,11aR)</i> -9,10-dimethoxy-6a,<br><i>11a-dihydro-6H-benzofurano</i> [3,<br><i>2-c]chromen-3-ol</i> | 5-hydroxytryptamine receptor 3A                | NCOA1  |
| <i>(6aR,11aR)</i> -9,10-dimethoxy-6a,<br><i>11a-dihydro-6H-benzofurano</i> [3,<br><i>2-c]chromen-3-ol</i> | Retinoic acid receptor<br>RXR-alpha            | PGR    |
| <i>(6aR,11aR)</i> -9,10-dimethoxy-6a,<br><i>11a-dihydro-6H-benzofurano</i> [3,<br><i>2-c]chromen-3-ol</i> | Acetylcholinesterase                           | LACTB2 |
| <i>(6aR,11aR)</i> -9,10-dimethoxy-6a,<br><i>11a-dihydro-6H-benzofurano</i> [3,<br><i>2-c]chromen-3-ol</i> | Alpha-1B adrenergic receptor                   | ADRA1B |
| <i>(6aR,11aR)</i> -9,10-dimethoxy-6a,<br><i>11a-dihydro-6H-benzofurano</i> [3,                            | Beta-2 adrenergic receptor                     | ADRB2  |

---

---

|                                                                                   |                                                        |        |
|-----------------------------------------------------------------------------------|--------------------------------------------------------|--------|
| <i>2-c]chromen-3-ol</i>                                                           |                                                        |        |
| <i>(6aR,11aR)-9,10-dimethoxy-6a,11a-dihydro-6H-benzofurano[3,2-c]chromen-3-ol</i> | Alpha-1D adrenergic receptor                           | ADRA1D |
| <i>(6aR,11aR)-9,10-dimethoxy-6a,11a-dihydro-6H-benzofurano[3,2-c]chromen-3-ol</i> | Gamma-aminobutyric acid receptor subunit alpha-1       | GABRA1 |
| <i>(6aR,11aR)-9,10-dimethoxy-6a,11a-dihydro-6H-benzofurano[3,2-c]chromen-3-ol</i> | Heat shock protein HSP 90                              | HSP 90 |
| <i>(6aR,11aR)-9,10-dimethoxy-6a,11a-dihydro-6H-benzofurano[3,2-c]chromen-3-ol</i> | Neuronal acetylcholine receptor protein, alpha-7 chain | OPRM1  |
| <i>(6aR,11aR)-9,10-dimethoxy-6a,11a-dihydro-6H-benzofurano[3,2-c]chromen-3-ol</i> | Trypsin-1                                              | PRSS1  |
| <i>(6aR,11aR)-9,10-dimethoxy-6a,11a-dihydro-6H-benzofurano[3,2-c]chromen-3-ol</i> | Nuclear receptor coactivator 2                         | NCOA2  |
| <i>(6aR,11aR)-9,10-dimethoxy-6a,11a-dihydro-6H-benzofurano[3,2-c]chromen-3-ol</i> | Nuclear receptor coactivator 1                         | NCOA1  |
| <i>(6aR,11aR)-9,10-dimethoxy-6a,11a-dihydro-6H-benzofurano[3,2-c]chromen-3-ol</i> | Calmodulin                                             | CALM   |
| <i>(6aR,11aR)-9,10-dimethoxy-6a,11a-dihydro-6H-benzofurano[3,2-c]chromen-3-ol</i> | Muscarinic acetylcholine receptor M4                   | CHRM4  |
| <i>Mairin</i>                                                                     | Progesterone receptor                                  | PGR    |

---

|                                |                                                     |        |
|--------------------------------|-----------------------------------------------------|--------|
| <i>3,9-Di-O-methylnissolin</i> | Nitric oxide synthase, inducible                    | NOS2   |
| <i>3,9-Di-O-methylnissolin</i> | Prostaglandin G/H synthase 1                        | PTGS1  |
| <i>3,9-Di-O-methylnissolin</i> | Muscarinic acetylcholine<br>receptor M3             | CHRNA7 |
| <i>3,9-Di-O-methylnissolin</i> | Thrombin                                            | F2     |
| <i>3,9-Di-O-methylnissolin</i> | Muscarinic acetylcholine<br>receptor M1             | CHRM1  |
| <i>3,9-Di-O-methylnissolin</i> | Estrogen receptor                                   | ESR1   |
| <i>3,9-Di-O-methylnissolin</i> | Beta-1 adrenergic receptor                          | ADRB1  |
| <i>3,9-Di-O-methylnissolin</i> | Sodium channel protein type 5<br>subunit alpha      | SCN5A  |
| <i>3,9-Di-O-methylnissolin</i> | Prostaglandin G/H synthase 2                        | PTGS2  |
| <i>3,9-Di-O-methylnissolin</i> | Nitric-oxide synthase, endothelial                  | NOS3   |
| <i>3,9-Di-O-methylnissolin</i> | 5-hydroxytryptamine receptor 3A                     | HTR3A  |
| <i>3,9-Di-O-methylnissolin</i> | Alpha-2C adrenergic receptor                        | ADRA2C |
| <i>3,9-Di-O-methylnissolin</i> | Retinoic acid receptor<br>RXR-alpha                 | RXRA   |
| <i>3,9-Di-O-methylnissolin</i> | Acetylcholinesterase                                | LACTB2 |
| <i>3,9-Di-O-methylnissolin</i> | CGMP-inhibited 3',5'-cyclic<br>phosphodiesterase A  | PDE3A  |
| <i>3,9-Di-O-methylnissolin</i> | Alpha-1B adrenergic receptor                        | ADRA1B |
| <i>3,9-Di-O-methylnissolin</i> | Beta-2 adrenergic receptor                          | ADRB2  |
| <i>3,9-Di-O-methylnissolin</i> | Alpha-1D adrenergic receptor                        | ADRA1D |
| <i>3,9-Di-O-methylnissolin</i> | Mu-type opioid receptor                             | OPRM1  |
| <i>3,9-Di-O-methylnissolin</i> | Gamma-aminobutyric acid<br>receptor subunit alpha-1 | GABRA1 |
| <i>3,9-Di-O-methylnissolin</i> | Trypsin-1                                           | PRSS1  |
| <i>3,9-Di-O-methylnissolin</i> | Nuclear receptor coactivator 2                      | NCOA2  |
| <i>3,9-Di-O-methylnissolin</i> | Calmodulin                                          | CALM   |

---

|                     |                                                              |        |
|---------------------|--------------------------------------------------------------|--------|
| <i>Jaranol</i>      | Nitric oxide synthase, inducible                             | NOS2   |
| <i>Jaranol</i>      | Prostaglandin G/H synthase 1                                 | PTGS1  |
| <i>Jaranol</i>      | Androgen receptor                                            | AR     |
| <i>Jaranol</i>      | Sodium channel protein type 5<br>subunit alpha               | SCN5A  |
| <i>Jaranol</i>      | Prostaglandin G/H synthase 2                                 | PTGS2  |
| <i>Jaranol</i>      | Estrogen receptor beta                                       | MAOB   |
| <i>Jaranol</i>      | Dipeptidyl peptidase IV                                      | DPP4   |
| <i>Jaranol</i>      | Heat shock protein HSP 90                                    | HSP 90 |
| <i>Jaranol</i>      | Cell division protein kinase 2                               | CDK2   |
| <i>Jaranol</i>      | Serine/threonine-protein kinase<br>Chk1                      | CHEK1  |
| <i>Jaranol</i>      | Trypsin-1                                                    | PRSS1  |
| <i>Jaranol</i>      | Nuclear receptor coactivator 2                               | NCOA2  |
| <i>Jaranol</i>      | Calmodulin                                                   | CALM   |
| <i>Isorhamnetin</i> | Nitric oxide synthase, inducible                             | NOS2   |
| <i>Isorhamnetin</i> | Prostaglandin G/H synthase 1                                 | PTGS1  |
| <i>Isorhamnetin</i> | Estrogen receptor                                            | ESR1   |
| <i>Isorhamnetin</i> | Androgen receptor                                            | AR     |
| <i>Isorhamnetin</i> | Peroxisome proliferator activated<br>receptor gamma          | PPARG  |
| <i>Isorhamnetin</i> | Prostaglandin G/H synthase 2                                 | PTGS2  |
| <i>Isorhamnetin</i> | mRNA of Protein-tyrosine<br>phosphatase, non-receptor type 1 | PTPN1  |
| <i>Isorhamnetin</i> | Estrogen receptor beta                                       | MAOB   |
| <i>Isorhamnetin</i> | Dipeptidyl peptidase IV                                      | DPP4   |
| <i>Isorhamnetin</i> | Mitogen-activated protein kinase<br>14                       | MAPK14 |
| <i>Isorhamnetin</i> | Glycogen synthase kinase-3 beta                              | GSK3B  |

---

---

|                     |                                                                                 |        |
|---------------------|---------------------------------------------------------------------------------|--------|
| <i>Isorhamnetin</i> | Heat shock protein HSP 90                                                       | HSP 90 |
| <i>Isorhamnetin</i> | Cell division protein kinase 2                                                  | CDK2   |
| <i>Isorhamnetin</i> | Phosphatidylinositol-4,5-bisphosphate 3-kinase catalytic subunit, gamma isoform | PIK3CG |
| <i>Isorhamnetin</i> | mRNA of PKA Catalytic Subunit C-alpha                                           | PRKACA |
| <i>Isorhamnetin</i> | Trypsin-1<br>Proto-oncogene                                                     | PRSS1  |
| <i>Isorhamnetin</i> | serine/threonine-protein kinase<br>Pim-1                                        | PIM1   |
| <i>Isorhamnetin</i> | Cyclin-A2                                                                       | CCNA2  |
| <i>Isorhamnetin</i> | Nuclear receptor coactivator 2                                                  | NCOA2  |
| <i>Isorhamnetin</i> | Calmodulin                                                                      | CALM   |
| <i>Isorhamnetin</i> | Glycogen phosphorylase, muscle form                                             | PYGM   |
| <i>Isorhamnetin</i> | Peroxisome proliferator activated receptor delta                                | PPARD  |
| <i>Isorhamnetin</i> | Serine/threonine-protein kinase<br>Chk1                                         | CHEK1  |
| <i>Isorhamnetin</i> | Aldose reductase                                                                | AKR1B1 |
| <i>Isorhamnetin</i> | Nuclear receptor coactivator 1                                                  | NCOA1  |
| <i>Isorhamnetin</i> | Coagulation factor VII                                                          | F7     |
| <i>Isorhamnetin</i> | Thrombin                                                                        | F2     |
| <i>Isorhamnetin</i> | Nitric-oxide synthase, endothelial                                              | NOS3   |
| <i>Isorhamnetin</i> | Acetylcholinesterase                                                            | LACTB2 |
| <i>Isorhamnetin</i> | Gamma-aminobutyric acid<br>receptor subunit alpha-1                             | GABRA1 |
| <i>Isorhamnetin</i> | Amine oxidase                                                                   | PKIA   |

---

---

|                                             |                                                     |        |
|---------------------------------------------|-----------------------------------------------------|--------|
|                                             | [flavin-containing] B                               |        |
| <i>Isorhamnetin</i>                         | Glutamate receptor 2                                | GRIA2  |
| <i>Isorhamnetin</i>                         | Cytochrome P450-cam                                 | CAMC   |
| <i>Isorhamnetin</i>                         | Transcription factor p65                            | RELA   |
| <i>Isorhamnetin</i>                         | Xanthine dehydrogenase/oxidase                      | XDH    |
| <i>Isorhamnetin</i>                         | Neutrophil cytosol factor 1                         | NCOA1  |
| <i>Isorhamnetin</i>                         | Oxidized low-density lipoprotein<br>receptor 1      | OLR1   |
| <i>isomucronulatol-7,2'-di-O-glucosiole</i> | DNA topoisomerase II                                | TOP2   |
| <i>Calycosin</i>                            | Nitric oxide synthase, inducible                    | NOS2   |
| <i>Calycosin</i>                            | Prostaglandin G/H synthase 1                        | PTGS1  |
| <i>Calycosin</i>                            | Estrogen receptor                                   | ESR1   |
| <i>Calycosin</i>                            | Androgen receptor                                   | AR     |
| <i>Calycosin</i>                            | Peroxisome proliferator activated<br>receptor gamma | PPARG  |
| <i>Calycosin</i>                            | Prostaglandin G/H synthase 2                        | PTGS2  |
| <i>Calycosin</i>                            | Retinoic acid receptor<br>RXR-alpha                 | RXRA   |
| <i>Calycosin</i>                            | CGMP-inhibited 3',5'-cyclic<br>phosphodiesterase A  | PDE3A  |
| <i>Calycosin</i>                            | Estrogen receptor beta                              | MAOB   |
| <i>Calycosin</i>                            | Dipeptidyl peptidase IV                             | DPP4   |
| <i>Calycosin</i>                            | Mitogen-activated protein kinase<br>14              | MAPK14 |
| <i>Calycosin</i>                            | Glycogen synthase kinase-3 beta                     | GSK3B  |
| <i>Calycosin</i>                            | Heat shock protein HSP 90                           | HSP 90 |
| <i>Calycosin</i>                            | Cell division protein kinase 2                      | CDK2   |
| <i>Calycosin</i>                            | Serine/threonine-protein kinase                     | CHEK1  |

---

---

|                  |                                                                                        |        |
|------------------|----------------------------------------------------------------------------------------|--------|
|                  | Chk1                                                                                   |        |
| <i>Calycosin</i> | mRNA of PKA Catalytic Subunit<br>C-alpha                                               | PRKACA |
| <i>Calycosin</i> | Trypsin-1                                                                              | PRSS1  |
|                  | Proto-oncogene                                                                         |        |
| <i>Calycosin</i> | serine/threonine-protein kinase<br>Pim-1                                               | PIM1   |
| <i>Calycosin</i> | Cyclin-A2                                                                              | CCNA2  |
| <i>Calycosin</i> | Nuclear receptor coactivator 2                                                         | NCOA2  |
| <i>Calycosin</i> | Calmodulin                                                                             | CALM   |
| <i>Calycosin</i> | Beta-2 adrenergic receptor                                                             | ADRB2  |
| <i>quercetin</i> | Prostaglandin G/H synthase 1                                                           | PTGS1  |
| <i>quercetin</i> | Androgen receptor                                                                      | AR     |
| <i>quercetin</i> | Peroxisome proliferator activated<br>receptor gamma                                    | PPARG  |
| <i>quercetin</i> | Prostaglandin G/H synthase 2                                                           | PTGS2  |
| <i>quercetin</i> | Heat shock protein HSP 90                                                              | HSP 90 |
|                  | Phosphatidylinositol-4,5-bisphos<br>phate 3-kinase catalytic subunit,<br>gamma isoform | PIK3CG |
| <i>quercetin</i> | Nuclear receptor coactivator 2                                                         | NCOA2  |
| <i>quercetin</i> | Dipeptidyl peptidase IV                                                                | DPP4   |
| <i>quercetin</i> | Aldose reductase                                                                       | AKR1B1 |
| <i>quercetin</i> | Trypsin-1                                                                              | PRSS1  |
| <i>quercetin</i> | DNA topoisomerase II                                                                   | TOP2   |
| <i>quercetin</i> | Thrombin                                                                               | F2     |
| <i>quercetin</i> | Potassium voltage-gated channel<br>subfamily H member 2                                | KCNH2  |
| <i>quercetin</i> | Sodium channel protein type 5                                                          | SCN5A  |

---



---

|                  |                                                     |        |
|------------------|-----------------------------------------------------|--------|
|                  | subunit alpha                                       |        |
| <i>quercetin</i> | Coagulation factor Xa                               | F10    |
| <i>quercetin</i> | Beta-2 adrenergic receptor                          | ADRB2  |
| <i>quercetin</i> | Stromelysin-1                                       | MMP3   |
| <i>quercetin</i> | mRNA of PKA Catalytic Subunit<br>C-alpha            | PRKACA |
| <i>quercetin</i> | Coagulation factor VII                              | F7     |
| <i>quercetin</i> | Nitric-oxide synthase, endothelial                  | NOS3   |
| <i>quercetin</i> | Retinoic acid receptor<br>RXR-alpha                 | RXRA   |
| <i>quercetin</i> | Acetylcholinesterase                                | LACTB2 |
| <i>quercetin</i> | Gamma-aminobutyric acid<br>receptor subunit alpha-1 | GABRA1 |
| <i>quercetin</i> | Amine oxidase<br>[flavin-containing] B              | PKIA   |
| <i>quercetin</i> | Transcription factor p65                            | RELA   |
| <i>quercetin</i> | Epidermal growth factor receptor                    | EGFR   |
| <i>quercetin</i> | RAC-alpha<br>serine/threonine-protein kinase        | AKT1   |
| <i>quercetin</i> | Vascular endothelial growth<br>factor A             | VEGFA  |
| <i>quercetin</i> | G1/S-specific cyclin-D1                             | CCND1  |
| <i>quercetin</i> | Apoptosis regulator Bcl-2                           | BCL2   |
| <i>quercetin</i> | Bcl-2-like protein 1                                | BCL2L1 |
| <i>quercetin</i> | Proto-oncogene c-Fos                                | FOS    |
| <i>quercetin</i> | Cyclin-dependent kinase<br>inhibitor 1              | CDKN1  |
| <i>quercetin</i> | Eukaryotic translation initiation<br>factor 6       | EIF6   |

---

---

|                  |                                                            |        |
|------------------|------------------------------------------------------------|--------|
| <i>quercetin</i> | Apoptosis regulator BAX                                    | BAX    |
| <i>quercetin</i> | Caspase-9                                                  | CASP9  |
| <i>quercetin</i> | Urokinase-type plasminogen<br>activator                    | PLAU   |
| <i>quercetin</i> | 72 kDa type IV collagenase                                 | MMP2   |
| <i>quercetin</i> | Matrix metalloproteinase-9                                 | MMP9   |
| <i>quercetin</i> | Mitogen-activated protein kinase<br>1                      | MAPK1  |
| <i>quercetin</i> | Interleukin-10                                             | IL10   |
| <i>quercetin</i> | Pro-epidermal growth factor                                | EGF    |
| <i>quercetin</i> | Retinoblastoma-associated<br>protein                       | RB1    |
| <i>quercetin</i> | Tumor necrosis factor                                      | TNF    |
| <i>quercetin</i> | Transcription factor AP-1                                  | IL4    |
| <i>quercetin</i> | Interleukin-6                                              | IL6    |
| <i>quercetin</i> | Cyclin-dependent kinase<br>inhibitor 2A, isoforms 1/2/3    | CDKN2A |
| <i>quercetin</i> | Activator of 90 kDa heat shock<br>protein ATPase homolog 1 | AHSA1  |
| <i>quercetin</i> | Caspase-3                                                  | CASP3  |
| <i>quercetin</i> | Cellular tumor antigen p53                                 | TP53   |
| <i>quercetin</i> | ETS domain-containing protein<br>Elk-1                     | ELK1   |
| <i>quercetin</i> | NF-kappa-B inhibitor alpha                                 | NFKBIA |
| <i>quercetin</i> | NADPH--cytochrome P450<br>reductase                        | POR    |
| <i>quercetin</i> | Ornithine decarboxylase                                    | ODC1   |
| <i>quercetin</i> | Xanthine dehydrogenase/oxidase                             | XDH    |
| <i>quercetin</i> | Caspase-8                                                  | CASP8  |

---

---

|                  |                                                                  |         |
|------------------|------------------------------------------------------------------|---------|
| <i>quercetin</i> | DNA topoisomerase 1                                              | TOP1    |
| <i>quercetin</i> | RAF proto-oncogene<br>serine/threonine-protein kinase            | RAF1    |
| <i>quercetin</i> | Superoxide dismutase [Cu-Zn]                                     | SOD1    |
| <i>quercetin</i> | Protein kinase C alpha type                                      | PRKCA   |
| <i>quercetin</i> | Interstitial collagenase                                         | MMP1    |
| <i>quercetin</i> | Hypoxia-inducible factor 1-alpha                                 | HIF1A   |
| <i>quercetin</i> | Signal transducer and activator of<br>transcription 1-alpha/beta | STAT1   |
| <i>quercetin</i> | Protein CBFA2T1                                                  | RUNX1T1 |
| <i>quercetin</i> | Probable E3 ubiquitin-protein<br>ligase HERC5                    | HERC5   |
| <i>quercetin</i> | Cell division control protein 2<br>homolog                       | CDK1    |
| <i>quercetin</i> | 78 kDa glucose-regulated protein                                 | HSPA5   |
| <i>quercetin</i> | Receptor tyrosine-protein kinase<br>erbB-2                       | ERBB2   |
| <i>quercetin</i> | Peroxisome proliferator-activated<br>receptor gamma              | PPARG   |
| <i>quercetin</i> | Acetyl-CoA carboxylase 1                                         | ACACA   |
| <i>quercetin</i> | Heme oxygenase 1                                                 | HMOX1   |
| <i>quercetin</i> | Cytochrome P450 3A4                                              | CYP3A4  |
| <i>quercetin</i> | Cytochrome P450 1A2                                              | CYP1A2  |
| <i>quercetin</i> | Caveolin-1                                                       | CAV1    |
| <i>quercetin</i> | Myc proto-oncogene protein                                       | MYC     |
| <i>quercetin</i> | Tissue factor                                                    | F3      |
| <i>quercetin</i> | Gap junction alpha-1 protein                                     | GJA1    |
| <i>quercetin</i> | Cytochrome P450 1A1                                              | CYP1A1  |
| <i>quercetin</i> | Intercellular adhesion molecule 1                                | ICAM1   |

---

---

|                  |                                                  |          |
|------------------|--------------------------------------------------|----------|
| <i>quercetin</i> | Interleukin-1 beta                               | IL1B     |
| <i>quercetin</i> | C-C motif chemokine 2                            | CCL2     |
| <i>quercetin</i> | E-selectin                                       | SELE     |
| <i>quercetin</i> | Vascular cell adhesion protein 1                 | VCAM1    |
| <i>quercetin</i> | Prostaglandin E2 receptor EP3<br>subtype         | PTGER3   |
| <i>quercetin</i> | Interleukin-8                                    | CXCL8    |
| <i>quercetin</i> | Protein kinase C beta type                       | PRKCB    |
| <i>quercetin</i> | Baculoviral IAP<br>repeat-containing protein 5   | BIRC5    |
| <i>quercetin</i> | Dual oxidase 2                                   | DUOX2    |
| <i>quercetin</i> | Nitric oxide synthase, endothelial               | NOS3     |
| <i>quercetin</i> | Heat shock protein beta-1                        | HSPB1    |
| <i>quercetin</i> | Transforming growth factor<br>beta-1             | TGFB1    |
| <i>quercetin</i> | Estrogen sulfotransferase                        | SULT1E1  |
| <i>quercetin</i> | Maltase-glucoamylase, intestinal                 | MGAM     |
| <i>quercetin</i> | Interleukin-2                                    | IL2      |
| <i>quercetin</i> | Nuclear receptor subfamily 1<br>group I member 2 | NR2C2    |
| <i>quercetin</i> | Cytochrome P450 1B1                              | CYP1B1   |
| <i>quercetin</i> | G2/mitotic-specific cyclin-B1                    | CCNB1    |
| <i>quercetin</i> | Tissue-type plasminogen<br>activator             | PLAT     |
| <i>quercetin</i> | Thrombomodulin                                   | THBD     |
| <i>quercetin</i> | Plasminogen activator inhibitor 1                | SERPINE1 |
| <i>quercetin</i> | Collagen alpha-1(I) chain                        | COL1A1   |
| <i>quercetin</i> | Interferon gamma                                 | IFNG     |
| <i>quercetin</i> | Arachidonate 5-lipoxygenase                      | ALOX5    |

---

---

|                  |                                                                                                      |        |
|------------------|------------------------------------------------------------------------------------------------------|--------|
|                  | Phosphatidylinositol-3,4,5-trisphosphate 3-phosphatase and dual-specificity protein phosphatase PTEN | PTEN   |
| <i>quercetin</i> |                                                                                                      |        |
| <i>quercetin</i> | Interleukin-1 alpha                                                                                  | IL1A   |
| <i>quercetin</i> | Myeloperoxidase                                                                                      | MPO    |
| <i>quercetin</i> | DNA topoisomerase 2-alpha                                                                            | TOP2A  |
| <i>quercetin</i> | Neutrophil cytosol factor 1                                                                          | NCF1   |
| <i>quercetin</i> | ATP-binding cassette sub-family G member 2                                                           | ABCG2  |
| <i>quercetin</i> | Hyaluronan synthase 2                                                                                | HAS2   |
| <i>quercetin</i> | Glutathione S-transferase P                                                                          | GSTP1  |
| <i>quercetin</i> | Nuclear factor erythroid 2-related factor 2                                                          | NFE2L2 |
| <i>quercetin</i> | NAD(P)H dehydrogenase [quinone] 1                                                                    | NQO1   |
| <i>quercetin</i> | Poly [ADP-ribose] polymerase 1                                                                       | PARP1  |
| <i>quercetin</i> | Aryl hydrocarbon receptor                                                                            | AHR    |
| <i>quercetin</i> | 26S proteasome non-ATPase regulatory subunit 3                                                       | PSMD3  |
| <i>quercetin</i> | Solute carrier family 2, facilitated glucose transporter member 4                                    | SLC2A4 |
| <i>quercetin</i> | Collagen alpha-1(III) chain                                                                          | COL3A1 |
| <i>quercetin</i> | DNA gyrase subunit B                                                                                 | GYRB   |
| <i>quercetin</i> | C-X-C motif chemokine 11                                                                             | CXCL11 |
| <i>quercetin</i> | C-X-C motif chemokine 2                                                                              | CXCL2  |
| <i>quercetin</i> | DDB1- and CUL4-associated factor 5                                                                   | DCAF5  |
| <i>quercetin</i> | Nuclear receptor subfamily 1                                                                         | NR1I3  |

---

---

|                  |                                                             |        |
|------------------|-------------------------------------------------------------|--------|
|                  | group I member 3                                            |        |
| <i>quercetin</i> | Serine/threonine-protein kinase<br>Chk2                     | CHEK2  |
| <i>quercetin</i> | Insulin receptor                                            | INSR   |
| <i>quercetin</i> | Claudin-4                                                   | CLDN4  |
| <i>quercetin</i> | Peroxisome proliferator-activated<br>receptor alpha         | PPARA  |
| <i>quercetin</i> | Peroxisome proliferator-activated<br>receptor delta         | PPARD  |
| <i>quercetin</i> | Heat shock factor protein 1                                 | HSF1   |
| <i>quercetin</i> | C-reactive protein                                          | CRP    |
| <i>quercetin</i> | C-X-C motif chemokine 10                                    | CXCL10 |
| <i>quercetin</i> | Inhibitor of nuclear factor<br>kappa-B kinase subunit alpha | CHUK   |
| <i>quercetin</i> | Osteopontin                                                 | SPP1   |
| <i>quercetin</i> | Runt-related transcription factor<br>2                      | RUNX2  |
| <i>quercetin</i> | Ras association<br>domain-containing protein 1              | RASSF1 |
| <i>quercetin</i> | Transcription factor E2F1                                   | E2F1   |
| <i>quercetin</i> | Transcription factor E2F2                                   | E2F2   |
| <i>quercetin</i> | Prostatic acid phosphatase                                  | ACPP   |
| <i>quercetin</i> | Cathepsin D                                                 | CTSD   |
| <i>quercetin</i> | Insulin-like growth<br>factor-binding protein 3             | IGFBP3 |
| <i>quercetin</i> | Insulin-like growth factor II                               | IGF2   |
| <i>quercetin</i> | CD40 ligand                                                 | CD40LG |
| <i>quercetin</i> | Interferon regulatory factor 1                              | IRF1   |
| <i>quercetin</i> | Receptor tyrosine-protein kinase                            | ERBB3  |

---

---

|                   |                                                                                        |        |
|-------------------|----------------------------------------------------------------------------------------|--------|
|                   | erbB-3                                                                                 |        |
| <i>quercetin</i>  | Serum paraoxonase/arylesterase<br>1                                                    | PON1   |
| <i>quercetin</i>  | Type I iodothyronine deiodinase                                                        | DIO1   |
| <i>quercetin</i>  | Procollagen C-endopeptidase<br>enhancer 1                                              | PCOLCE |
| <i>quercetin</i>  | Puromycin-sensitive<br>aminopeptidase                                                  | NPEPPS |
| <i>quercetin</i>  | Hexokinase-2                                                                           | HK2    |
| <i>quercetin</i>  | Homeobox protein Nkx-3.1                                                               | NKX3-1 |
| <i>quercetin</i>  | Ras GTPase-activating protein 1                                                        | RASA1  |
| <i>quercetin</i>  | Peroxidase C1A                                                                         | PRXC1A |
| <i>quercetin</i>  | Glutathione S-transferase Mu 1                                                         | GSTM1  |
| <i>quercetin</i>  | Glutathione S-transferase Mu 2                                                         | GSTM2  |
| <i>kaempferol</i> | Nitric oxide synthase, inducible                                                       | NOS2   |
| <i>kaempferol</i> | Prostaglandin G/H synthase 1                                                           | PTGS1  |
| <i>kaempferol</i> | Androgen receptor                                                                      | AR     |
| <i>kaempferol</i> | Peroxisome proliferator activated<br>receptor gamma                                    | PPARG  |
| <i>kaempferol</i> | Prostaglandin G/H synthase 2                                                           | PTGS2  |
| <i>kaempferol</i> | Heat shock protein HSP 90                                                              | HSP 90 |
| <i>kaempferol</i> | Phosphatidylinositol-4,5-bisphos<br>phate 3-kinase catalytic subunit,<br>gamma isoform | PIK3CG |
| <i>kaempferol</i> | mRNA of PKA Catalytic Subunit<br>C-alpha                                               | PRKACA |
| <i>kaempferol</i> | Nuclear receptor coactivator 2                                                         | NCOA2  |
| <i>kaempferol</i> | Dipeptidyl peptidase IV                                                                | DPP4   |
| <i>kaempferol</i> | Trypsin-1                                                                              | PRSS1  |

---

---

|                   |                                                            |        |
|-------------------|------------------------------------------------------------|--------|
| <i>kaempferol</i> | Progesterone receptor                                      | PGR    |
| <i>kaempferol</i> | Thrombin                                                   | F2     |
| <i>kaempferol</i> | Muscarinic acetylcholine<br>receptor M1                    | CHRM1  |
| <i>kaempferol</i> | Nitric-oxide synthase, endothelial                         | NOS3   |
| <i>kaempferol</i> | Gamma-aminobutyric-acid<br>receptor alpha-2 subunit        | GABRA2 |
| <i>kaempferol</i> | Acetylcholinesterase                                       | LACTB2 |
| <i>kaempferol</i> | Sodium-dependent noradrenaline<br>transporter              | SLC6A2 |
| <i>kaempferol</i> | Muscarinic acetylcholine<br>receptor M2                    | CHRM2  |
| <i>kaempferol</i> | Alpha-1B adrenergic receptor                               | ADRA1B |
| <i>kaempferol</i> | Gamma-aminobutyric acid<br>receptor subunit alpha-1        | GABRA1 |
| <i>kaempferol</i> | DNA topoisomerase II                                       | TOP2   |
| <i>kaempferol</i> | Coagulation factor VII                                     | F7     |
| <i>kaempferol</i> | Calmodulin                                                 | CALM   |
| <i>kaempferol</i> | Transcription factor p65                                   | RELA   |
| <i>kaempferol</i> | Inhibitor of nuclear factor<br>kappa-B kinase subunit beta | IKBKB  |
| <i>kaempferol</i> | RAC-alpha<br>serine/threonine-protein kinase               | AKT1   |
| <i>kaempferol</i> | Apoptosis regulator Bcl-2                                  | BCL2   |
| <i>kaempferol</i> | Apoptosis regulator BAX                                    | BAX    |
| <i>kaempferol</i> | Tumor necrosis factor                                      | TNF    |
| <i>kaempferol</i> | Transcription factor AP-1                                  | IL4    |
| <i>kaempferol</i> | Activator of 90 kDa heat shock<br>protein ATPase homolog 1 | AHSA1  |

---



---

|                                                     |                                                                  |        |
|-----------------------------------------------------|------------------------------------------------------------------|--------|
| <i>kaempferol</i>                                   | Caspase-3                                                        | CASP3  |
| <i>kaempferol</i>                                   | Mitogen-activated protein kinase<br>8                            | MAPK8  |
| <i>kaempferol</i>                                   | Xanthine dehydrogenase/oxidase                                   | XDH    |
| <i>kaempferol</i>                                   | Interstitial collagenase                                         | MMP1   |
| <i>kaempferol</i>                                   | Signal transducer and activator of<br>transcription 1-alpha/beta | STAT1  |
| <i>kaempferol</i>                                   | Cell division control protein 2<br>homolog                       | CDK1   |
| <i>kaempferol</i>                                   | Peroxisome proliferator-activated<br>receptor gamma              | PPARG  |
| <i>kaempferol</i>                                   | Heme oxygenase 1                                                 | HMOX1  |
| <i>kaempferol</i>                                   | Cytochrome P450 3A4                                              | CYP3A4 |
| <i>kaempferol</i>                                   | Cytochrome P450 1A2                                              | CYP1A2 |
| <i>kaempferol</i>                                   | Cytochrome P450 1A1                                              | CYP1A1 |
| <i>kaempferol</i>                                   | Intercellular adhesion molecule 1                                | ICAM1  |
| <i>kaempferol</i>                                   | E-selectin                                                       | SELE   |
| <i>kaempferol</i>                                   | Vascular cell adhesion protein 1                                 | VCAM1  |
| <i>kaempferol</i>                                   | Nuclear receptor subfamily 1<br>group I member 2                 | NR2C2  |
| <i>kaempferol</i>                                   | Cytochrome P450 1B1                                              | CYP1B1 |
| <i>kaempferol</i>                                   | Arachidonate 5-lipoxygenase                                      | ALOX5  |
| <i>kaempferol</i>                                   | Hyaluronan synthase 2                                            | HAS2   |
| <i>1,7-Dihydroxy-3,9-dimethoxy<br/>pterocarpene</i> | Prostaglandin G/H synthase 2                                     | PTGS2  |
| <i>1,7-Dihydroxy-3,9-dimethoxy<br/>pterocarpene</i> | Retinoic acid receptor<br>RXR-alpha                              | RXRA   |
| <i>1,7-Dihydroxy-3,9-dimethoxy<br/>pterocarpene</i> | Heat shock protein HSP 90                                        | HSP 90 |

---

---

|                                                     |                                                                               |         |
|-----------------------------------------------------|-------------------------------------------------------------------------------|---------|
| <i>1,7-Dihydroxy-3,9-dimethoxy<br/>pterocarpene</i> | Trypsin-1                                                                     | PRSS1   |
| <i>hederagenin</i>                                  | Progesterone receptor                                                         | PGR     |
| <i>hederagenin</i>                                  | Nuclear receptor coactivator 2                                                | NCOA2   |
| <i>hederagenin</i>                                  | Muscarinic acetylcholine<br>receptor M3                                       | CHRNA7  |
| <i>hederagenin</i>                                  | Muscarinic acetylcholine<br>receptor M1                                       | CHRM1   |
| <i>hederagenin</i>                                  | Gamma-aminobutyric-acid<br>receptor alpha-2 subunit                           | GABRA2  |
| <i>hederagenin</i>                                  | Gamma-aminobutyric-acid<br>receptor alpha-3 subunit                           | GABRA3  |
| <i>hederagenin</i>                                  | Muscarinic acetylcholine<br>receptor M2                                       | CHRM2   |
| <i>hederagenin</i>                                  | Alpha-1B adrenergic receptor                                                  | ADRA1B  |
| <i>hederagenin</i>                                  | Gamma-aminobutyric acid<br>receptor subunit alpha-1                           | GABRA1  |
| <i>hederagenin</i>                                  | Glutamate receptor 2                                                          | GRIA2   |
| <i>hederagenin</i>                                  | Gamma-aminobutyric-acid<br>receptor subunit alpha-6                           | GABRA6  |
| <i>hederagenin</i>                                  | Gamma-aminobutyric-acid<br>receptor alpha-5 subunit                           | GABRA5  |
| <i>hederagenin</i>                                  | Ig gamma-1 chain C region                                                     | IGHG1   |
| <i>hederagenin</i>                                  | Alcohol dehydrogenase 1B                                                      | ALDH1B1 |
| <i>hederagenin</i>                                  | Alcohol dehydrogenase 1C                                                      | ALDH3A1 |
| <i>hederagenin</i>                                  | Lysozyme                                                                      | LYZ1    |
| <i>hederagenin</i>                                  | Nicotinate-nucleotide--dimethylb<br>enzimidazole<br>phosphoribosyltransferase | COBT    |

---

|                                                                                                                                                                                            |                                                    |         |
|--------------------------------------------------------------------------------------------------------------------------------------------------------------------------------------------|----------------------------------------------------|---------|
| <i>hederagenin</i>                                                                                                                                                                         | Prostaglandin G/H synthase 1                       | PTGS1   |
| <i>hederagenin</i>                                                                                                                                                                         | Sodium channel protein type 5<br>subunit alpha     | SCN5A   |
| <i>hederagenin</i>                                                                                                                                                                         | Prostaglandin G/H synthase 2                       | PTGS2   |
| <i>hederagenin</i>                                                                                                                                                                         | Retinoic acid receptor<br>RXR-alpha                | RXRA    |
| <i>hederagenin</i>                                                                                                                                                                         | CGMP-inhibited 3',5'-cyclic<br>phosphodiesterase A | PDE3A   |
| <i>hederagenin</i>                                                                                                                                                                         | Sodium-dependent noradrenaline<br>transporter      | SLC6A2  |
| <i>hederagenin</i>                                                                                                                                                                         | Cytochrome P450-cam                                | CYP21A2 |
| <i>9,10-dimethoxypterocarpan-3-<br/>O-β-D-glucoside</i>                                                                                                                                    | Prostaglandin G/H synthase 2                       | PTGS2   |
| <i>9,10-dimethoxypterocarpan-3-<br/>O-β-D-glucoside</i>                                                                                                                                    | DNA topoisomerase II                               | TOP2    |
| <i>9,10-dimethoxypterocarpan-3-<br/>O-β-D-glucoside</i>                                                                                                                                    | Nuclear receptor coactivator 2                     | NCOA2   |
| <i>(3S,8S,9S,10R,13R,14S,17R)-10<br/>,13-dimethyl-17-[(2R,5S)-5-pro<br/>pan-2-yl]octan-2-yl]-2,3,4,7,8,9,<br/>11,12,14,15,16,17-dodecahydro<br/>-1H-cyclopenta[a]phenanthren-<br/>3-ol</i> | Progesterone receptor                              | PGR     |
| <i>Bifendate</i>                                                                                                                                                                           | Prostaglandin G/H synthase 2                       | PTGS2   |
| <i>Bifendate</i>                                                                                                                                                                           | Vascular endothelial growth<br>factor receptor 2   | KDR     |
| <i>Bifendate</i>                                                                                                                                                                           | Hepatocyte growth factor<br>receptor               | MET     |
| <i>Bifendate</i>                                                                                                                                                                           | Heat shock protein HSP 90                          | HSP 90  |

---

|                        |                                                                                 |        |
|------------------------|---------------------------------------------------------------------------------|--------|
| <i>Bifendate</i>       | Calcium-activated potassium channel subunit alpha 1                             | KCNMA1 |
| <i>Bifendate</i>       | Prostaglandin G/H synthase 1                                                    | PTGS1  |
| <i>Bifendate</i>       | DNA topoisomerase II                                                            | TOP2   |
| <i>beta-sitosterol</i> | Progesterone receptor                                                           | PGR    |
| <i>beta-sitosterol</i> | Nuclear receptor coactivator 2                                                  | NCOA2  |
| <i>beta-sitosterol</i> | Prostaglandin G/H synthase 1                                                    | PTGS1  |
| <i>beta-sitosterol</i> | Prostaglandin G/H synthase 2                                                    | PTGS2  |
| <i>beta-sitosterol</i> | Heat shock protein HSP 90                                                       | HSP 90 |
| <i>beta-sitosterol</i> | Phosphatidylinositol-4,5-bisphosphate 3-kinase catalytic subunit, gamma isoform | PIK3CG |
| <i>beta-sitosterol</i> | Potassium voltage-gated channel subfamily H member 2                            | KCNH2  |
| <i>beta-sitosterol</i> | mRNA of PKA Catalytic Subunit C-alpha                                           | PRKACA |
| <i>beta-sitosterol</i> | Dopamine D1 receptor                                                            | DRD1   |
| <i>beta-sitosterol</i> | Muscarinic acetylcholine receptor M3                                            | CHRNA7 |
| <i>beta-sitosterol</i> | Muscarinic acetylcholine receptor M1                                            | CHRM1  |
| <i>beta-sitosterol</i> | Sodium channel protein type 5 subunit alpha                                     | SCN5A  |
| <i>beta-sitosterol</i> | Gamma-aminobutyric-acid receptor alpha-2 subunit                                | GABRA2 |
| <i>beta-sitosterol</i> | Muscarinic acetylcholine receptor M4                                            | CHRM4  |
| <i>beta-sitosterol</i> | CGMP-inhibited 3',5'-cyclic phosphodiesterase A                                 | PDE3A  |

---

---

|                        |                                                           |         |
|------------------------|-----------------------------------------------------------|---------|
| <i>beta-sitosterol</i> | 5-hydroxytryptamine 2A receptor                           | HTR2A   |
| <i>beta-sitosterol</i> | Gamma-aminobutyric-acid<br>receptor alpha-5 subunit       | GABRA5  |
| <i>beta-sitosterol</i> | Alpha-1A adrenergic receptor                              | ADRA1A  |
| <i>beta-sitosterol</i> | Gamma-aminobutyric-acid<br>receptor alpha-3 subunit       | GABRA3  |
| <i>beta-sitosterol</i> | Muscarinic acetylcholine<br>receptor M2                   | CHRM2   |
| <i>beta-sitosterol</i> | Alpha-1B adrenergic receptor                              | ADRA1B  |
| <i>beta-sitosterol</i> | Beta-2 adrenergic receptor                                | ADRB2   |
| <i>beta-sitosterol</i> | Neuronal acetylcholine receptor<br>subunit alpha-2        | CHRNA2  |
| <i>beta-sitosterol</i> | Sodium-dependent serotonin<br>transporter                 | SLC6A4  |
| <i>beta-sitosterol</i> | Mu-type opioid receptor                                   | OPRM1   |
| <i>beta-sitosterol</i> | Gamma-aminobutyric acid<br>receptor subunit alpha-1       | GABRA1  |
| <i>beta-sitosterol</i> | Neuronal acetylcholine receptor<br>protein, alpha-7 chain | OPRM1   |
| <i>beta-sitosterol</i> | Cytochrome P450-cam                                       | CYP21A2 |
| <i>beta-sitosterol</i> | Apoptosis regulator Bcl-2                                 | BCL2    |
| <i>beta-sitosterol</i> | Apoptosis regulator BAX                                   | BAX     |
| <i>beta-sitosterol</i> | Caspase-9                                                 | CASP9   |
| <i>beta-sitosterol</i> | Transcription factor AP-1                                 | IL4     |
| <i>beta-sitosterol</i> | Caspase-3                                                 | CASP3   |
| <i>beta-sitosterol</i> | Caspase-8                                                 | CASP8   |
| <i>beta-sitosterol</i> | Protein kinase C alpha type                               | PRKCA   |
| <i>beta-sitosterol</i> | Transforming growth factor<br>beta-1                      | TGFB1   |

---

---

|                        |                                               |        |
|------------------------|-----------------------------------------------|--------|
| <i>beta-sitosterol</i> | Serum paraoxonase/arylesterase<br>1           | PON1   |
| <i>beta-sitosterol</i> | Microtubule-associated protein 2              | MAP2   |
| <i>Stigmasterol</i>    | Progesterone receptor                         | PGR    |
| <i>Stigmasterol</i>    | Mineralocorticoid receptor                    | NR3C2  |
| <i>Stigmasterol</i>    | Nuclear receptor coactivator 2                | NCOA2  |
| <i>Stigmasterol</i>    | Alcohol dehydrogenase 1C                      | ADH1C  |
| <i>Stigmasterol</i>    | Ig gamma-1 chain C region                     | IGHG1  |
| <i>Stigmasterol</i>    | Retinoic acid receptor<br>RXR-alpha           | RXRA   |
| <i>Stigmasterol</i>    | Nuclear receptor coactivator 1                | NCOA1  |
| <i>Stigmasterol</i>    | Prostaglandin G/H synthase 1                  | PTGS1  |
| <i>Stigmasterol</i>    | Prostaglandin G/H synthase 2                  | PTGS2  |
| <i>Stigmasterol</i>    | Alpha-2A adrenergic receptor                  | ADRA2A |
| <i>Stigmasterol</i>    | Sodium-dependent noradrenaline<br>transporter | SLC6A2 |
| <i>Stigmasterol</i>    | Sodium-dependent dopamine<br>transporter      | SLC6A3 |
| <i>Stigmasterol</i>    | Beta-2 adrenergic receptor                    | ADRB2  |
| <i>Stigmasterol</i>    | Aldose reductase                              | AKR1B1 |
| <i>Stigmasterol</i>    | Urokinase-type plasminogen<br>activator       | PLAU   |
| <i>Stigmasterol</i>    | Leukotriene A-4 hydrolase                     | LTA4H  |
| <i>Stigmasterol</i>    | Amine oxidase<br>[flavin-containing] B        | PKIA   |
| <i>Stigmasterol</i>    | Amine oxidase<br>[flavin-containing] A        | MAOA   |
| <i>Stigmasterol</i>    | mRNA of PKA Catalytic Subunit<br>C-alpha      | PRKACA |

---

|                     |                                                           |        |
|---------------------|-----------------------------------------------------------|--------|
| <i>Stigmasterol</i> | Chymotrypsinogen B                                        | CTRB1  |
| <i>Stigmasterol</i> | Muscarinic acetylcholine<br>receptor M3                   | CHRNA7 |
| <i>Stigmasterol</i> | Muscarinic acetylcholine<br>receptor M1                   | CHRM1  |
| <i>Stigmasterol</i> | Beta-1 adrenergic receptor                                | ADRB1  |
| <i>Stigmasterol</i> | Sodium channel protein type 5<br>subunit alpha            | SCN5A  |
| <i>Stigmasterol</i> | 5-hydroxytryptamine 2A receptor                           | HTR2A  |
| <i>Stigmasterol</i> | Alpha-1A adrenergic receptor                              | ADRA1A |
| <i>Stigmasterol</i> | Gamma-aminobutyric-acid<br>receptor alpha-3 subunit       | GABRA3 |
| <i>Stigmasterol</i> | Muscarinic acetylcholine<br>receptor M2                   | CHRM2  |
| <i>Stigmasterol</i> | Alpha-1B adrenergic receptor                              | ADRA1B |
| <i>Stigmasterol</i> | Gamma-aminobutyric acid<br>receptor subunit alpha-1       | GABRA1 |
| <i>Stigmasterol</i> | Neuronal acetylcholine receptor<br>protein, alpha-7 chain | OPRM1  |

**Supplementary Table S3** Proteins targeted by 17 active compounds of AR-RAS were enriched in 95 signal pathways(P<0.001).

| Term                                   | Gene<br>Count | %               | P-Value      | Fold<br>Enrichment | Gene Count<br>%<br>Benjamini | P-Value |
|----------------------------------------|---------------|-----------------|--------------|--------------------|------------------------------|---------|
| <i>hsa05200:Pathways in<br/>cancer</i> | 53            | 27.31958<br>763 | 1.30E-2<br>4 | 5.2947894<br>98    | 2.83E-22                     |         |
| <i>hsa05161:Hepatitis B</i>            | 34            | 17.52577<br>32  | 3.97E-2<br>3 | 9.2061128<br>53    | 4.31E-21                     |         |

|                                                           |    |                 |              |                 |          |
|-----------------------------------------------------------|----|-----------------|--------------|-----------------|----------|
| <i>hsa05212:Pancreatic cancer</i>                         | 22 | 11.34020<br>619 | 1.97E-1<br>8 | 13.288461<br>54 | 1.43E-16 |
| <i>hsa05223:Non-small cell lung cancer</i>                | 19 | 9.793814<br>433 | 6.70E-1<br>6 | 13.320819<br>81 | 3.62E-14 |
| <i>hsa05219:Bladder cancer</i>                            | 17 | 8.762886<br>598 | 8.26E-1<br>6 | 16.279102       | 3.38E-14 |
| <i>hsa05215:Prostate cancer</i>                           | 22 | 11.34020<br>619 | 2.03E-1<br>5 | 9.8153409<br>09 | 7.23E-14 |
| <i>hsa04668:TNF signaling pathway</i>                     | 23 | 11.85567<br>01  | 9.86E-1<br>5 | 8.5189751<br>29 | 3.06E-13 |
| <i>hsa05222:Small cell lung cancer</i>                    | 21 | 10.82474<br>227 | 1.34E-1<br>4 | 9.6998663<br>1  | 3.64E-13 |
| <i>hsa05142:Chagas disease (American trypanosomiasis)</i> | 22 | 11.34020<br>619 | 7.46E-1<br>4 | 8.3052884<br>62 | 1.80E-12 |
| <i>hsa05145:Toxoplasmosis</i>                             | 22 | 11.34020<br>619 | 1.03E-1<br>2 | 7.3199152<br>54 | 2.23E-11 |
| <i>hsa05140:Leishmaniasis</i>                             | 18 | 9.278350<br>515 | 1.05E-1<br>2 | 9.9535851<br>47 | 2.07E-11 |
| <i>hsa05210:Colorectal cancer</i>                         | 17 | 8.762886<br>598 | 1.43E-1<br>2 | 10.765212<br>61 | 2.59E-11 |
| <i>hsa04620:Toll-like receptor signaling pathway</i>      | 20 | 10.30927<br>835 | 1.16E-1<br>1 | 7.4078044<br>6  | 1.94E-10 |
| <i>hsa05220:Chronic myeloid leukemia</i>                  | 17 | 8.762886<br>598 | 1.73E-1<br>1 | 9.2700441<br>92 | 2.68E-10 |
| <i>hsa05205:Proteoglycans in cancer</i>                   | 26 | 13.40206<br>186 | 2.28E-1<br>1 | 5.1039772<br>73 | 3.29E-10 |
| <i>hsa04066:HIF-1 signaling pathway</i>                   | 19 | 9.793814<br>433 | 2.71E-1<br>1 | 7.6118970<br>32 | 3.68E-10 |
| <i>hsa05164:Influenza A</i>                               | 24 | 12.37113        | 4.88E-1      | 5.4153605       | 6.23E-10 |



|                                                   |    |          |         |           |          |
|---------------------------------------------------|----|----------|---------|-----------|----------|
|                                                   |    | 402      | 1       | 02        |          |
| <i>hsa05160:Hepatitis C</i>                       | 21 | 10.82474 | 9.18E-1 | 6.1991626 | 1.11E-09 |
|                                                   |    | 227      | 1       | 79        |          |
| <i>hsa05166:HTLV-I infection</i>                  | 28 | 14.43298 | 1.81E-1 | 4.2942116 | 2.07E-09 |
|                                                   |    | 969      | 0       | 48        |          |
| <i>hsa05213:Endometrial cancer</i>                | 14 | 7.216494 | 3.03E-1 | 10.570367 | 3.29E-09 |
|                                                   |    | 845      | 0       | 13        |          |
| <i>hsa04919:Thyroid hormone signaling pathway</i> | 19 | 9.793814 | 3.72E-1 | 6.5435606 | 3.84E-09 |
|                                                   |    | 433      | 0       | 06        |          |
| <i>hsa04151:PI3K-Akt signaling pathway</i>        | 32 | 16.49484 | 4.16E-1 | 3.6416337 | 4.10E-09 |
|                                                   |    | 536      | 0       | 29        |          |
| <i>hsa05214:Glioma</i>                            | 15 | 7.731958 | 5.26E-1 | 9.0603146 | 4.96E-09 |
|                                                   |    | 763      | 0       | 85        |          |
| <i>hsa04660:T cell receptor signaling pathway</i> | 18 | 9.278350 | 5.77E-1 | 6.8612091 | 5.22E-09 |
|                                                   |    | 515      | 0       | 79        |          |
| <i>hsa04068:FoxO signaling pathway</i>            | 20 | 10.30927 | 7.87E-1 | 5.8599050 | 6.83E-09 |
|                                                   |    | 835      | 0       | 2         |          |
| <i>hsa04115:p53 signaling pathway</i>             | 15 | 7.731958 | 8.07E-1 | 8.7898575 | 6.73E-09 |
|                                                   |    | 763      | 0       | 31        |          |
| <i>hsa05169:Epstein-Barr virus infection</i>      | 23 | 11.85567 | 1.77E-0 | 4.7526913 | 1.42E-08 |
|                                                   |    | 01       | 9       | 88        |          |
| <i>hsa04210:Apoptosis</i>                         | 14 | 7.216494 | 3.18E-0 | 8.8654692 | 2.47E-08 |
|                                                   |    | 845      | 9       | 08        |          |
| <i>hsa04380:Osteoclast differentiation</i>        | 19 | 9.793814 | 3.79E-0 | 5.6943962 | 2.84E-08 |
|                                                   |    | 433      | 9       | 53        |          |
| <i>hsa05133:Pertussis</i>                         | 15 | 7.731958 | 3.87E-0 | 7.8522727 | 2.80E-08 |
|                                                   |    | 763      | 9       | 27        |          |
| <i>hsa05152:Tuberculosis</i>                      | 21 | 10.82474 | 1.57E-0 | 4.6581278 | 1.10E-07 |
|                                                   |    | 227      | 8       | 89        |          |

|                                                           |    |                 |              |                 |          |
|-----------------------------------------------------------|----|-----------------|--------------|-----------------|----------|
| <i>hsa04917:Prolactin signaling pathway</i>               | 14 | 7.216494<br>845 | 1.83E-0<br>8 | 7.7416773<br>37 | 1.24E-07 |
| <i>hsa05218:Melanoma</i>                                  | 14 | 7.216494<br>845 | 1.83E-0<br>8 | 7.7416773<br>37 | 1.24E-07 |
| <i>hsa04020:Calcium signaling pathway</i>                 | 21 | 10.82474<br>227 | 1.91E-0<br>8 | 4.6060817<br>67 | 1.25E-07 |
| <i>hsa04010:MAPK signaling pathway</i>                    | 25 | 12.88659<br>794 | 2.02E-0<br>8 | 3.8491532<br>98 | 1.29E-07 |
| <i>hsa04080:Neuroactive ligand-receptor interaction</i>   | 26 | 13.40206<br>186 | 2.32E-0<br>8 | 3.6851821<br>46 | 1.44E-07 |
| <i>hsa05144:Malaria</i>                                   | 12 | 6.185567<br>01  | 2.54E-0<br>8 | 9.6150278<br>29 | 1.53E-07 |
| <i>hsa04370:VEGF signaling pathway</i>                    | 13 | 6.701030<br>928 | 2.83E-0<br>8 | 8.3671758<br>57 | 1.66E-07 |
| <i>hsa04012:ErbB signaling pathway</i>                    | 15 | 7.731958<br>763 | 2.87E-0<br>8 | 6.7692006<br>27 | 1.64E-07 |
| <i>hsa04932:Non-alcoholic fatty liver disease (NAFLD)</i> | 19 | 9.793814<br>433 | 3.73E-0<br>8 | 4.9401715<br>83 | 2.08E-07 |
| <i>hsa04071:Sphingolipid signaling pathway</i>            | 17 | 8.762886<br>598 | 4.52E-0<br>8 | 5.5620265<br>15 | 2.45E-07 |
| <i>hsa05146:Amoebiasis</i>                                | 16 | 8.247422<br>68  | 5.41E-0<br>8 | 5.9262435<br>68 | 2.86E-07 |
| <i>hsa04931:Insulin resistance</i>                        | 16 | 8.247422<br>68  | 6.99E-0<br>8 | 5.8164983<br>16 | 3.61E-07 |
| <i>hsa05143:African trypanosomiasis</i>                   | 10 | 5.154639<br>175 | 7.98E-0<br>8 | 11.897382<br>92 | 4.03E-07 |
| <i>hsa04621:NOD-like receptor signaling pathway</i>       | 12 | 6.185567<br>01  | 9.13E-0<br>8 | 8.5661157<br>02 | 4.50E-07 |
| <i>hsa05221:Acute myeloid</i>                             | 12 | 6.185567        | 1.11E-0      | 8.4131493       | 5.36E-07 |

|                                |    |          |         |           |          |
|--------------------------------|----|----------|---------|-----------|----------|
| <i>leukemia</i>                |    | 01       | 7       | 51        |          |
| <i>hsa04510:Focal adhesion</i> | 21 | 10.82474 | 2.03E-0 | 4.0023720 | 9.58E-07 |
|                                |    | 227      | 7       | 21        |          |
| <i>hsa04064:NF-kappa B</i>     | 14 | 7.216494 | 2.26E-0 | 6.3179205 | 1.04E-06 |
| <i>signaling pathway</i>       |    | 845      | 7       | 85        |          |
| <i>hsa05230:Central carbon</i> | 12 | 6.185567 | 4.66E-0 | 7.3615056 | 2.10E-06 |
| <i>metabolism in cancer</i>    |    | 01       | 7       | 82        |          |
| <i>hsa05321:Inflammatory</i>   | 12 | 6.185567 | 4.66E-0 | 7.3615056 | 2.10E-06 |
| <i>bowel disease (IBD)</i>     |    | 01       | 7       | 82        |          |
| <i>hsa04725:Cholinergic</i>    | 15 | 7.731958 | 6.56E-0 | 5.3055896 | 2.91E-06 |
| <i>synapse</i>                 |    | 763      | 7       | 81        |          |
| <i>hsa05206:MicroRNAs in</i>   | 24 | 12.37113 | 6.77E-0 | 3.3062200 | 2.94E-06 |
| <i>cancer</i>                  |    | 402      | 7       | 96        |          |
| <i>hsa05134:Legionellosis</i>  | 11 | 5.670103 | 7.66E-0 | 7.9976851 | 3.26E-06 |
|                                |    | 093      | 7       | 85        |          |
| <i>hsa04014:Ras signaling</i>  | 21 | 10.82474 | 9.10E-0 | 3.6481798 | 3.80E-06 |
| <i>pathway</i>                 |    | 227      | 7       | 07        |          |
| <i>hsa05132:Salmonella</i>     | 13 | 6.701030 | 9.68E-0 | 6.1493702 | 3.96E-06 |
| <i>infection</i>               |    | 928      | 7       | 08        |          |
| <i>hsa05162:Measles</i>        | 16 | 8.247422 | 1.12E-0 | 4.7231715 | 4.48E-06 |
|                                |    | 68       | 6       | 65        |          |
| <i>hsa05020:Prion diseases</i> | 9  | 4.639175 | 1.17E-0 | 10.707644 | 4.60E-06 |
|                                |    | 258      | 6       | 63        |          |
| <i>hsa05323:Rheumatoid</i>     | 13 | 6.701030 | 1.84E-0 | 5.7999741 | 7.12E-06 |
| <i>arthritis</i>               |    | 928      | 6       | 74        |          |
| <i>hsa04024:cAMP signaling</i> | 19 | 9.793814 | 2.25E-0 | 3.7675045 | 8.57E-06 |
| <i>pathway</i>                 |    | 433      | 6       | 91        |          |
| <i>hsa04110:Cell cycle</i>     | 15 | 7.731958 | 2.55E-0 | 4.7493585 | 9.54E-06 |
|                                |    | 763      | 6       | 04        |          |

|                                                                            |    |                 |              |                 |          |
|----------------------------------------------------------------------------|----|-----------------|--------------|-----------------|----------|
| <i>hsa05014:Amyotrophic lateral sclerosis (ALS)</i>                        | 10 | 5.154639<br>175 | 3.58E-0<br>6 | 7.8522727<br>27 | 1.32E-05 |
| <i>hsa05202:Transcriptional misregulation in cancer</i>                    | 17 | 8.762886<br>598 | 4.65E-0<br>6 | 3.9728760<br>82 | 1.68E-05 |
| <i>hsa05120:Epithelial cell signaling in Helicobacter pylori infection</i> | 11 | 5.670103<br>093 | 5.97E-0<br>6 | 6.4458955<br>22 | 2.12E-05 |
| <i>hsa04915:Estrogen signaling pathway</i>                                 | 13 | 6.701030<br>928 | 6.49E-0<br>6 | 5.1555325<br>99 | 2.27E-05 |
| <i>hsa04662:B cell receptor signaling pathway</i>                          | 11 | 5.670103<br>093 | 7.84E-0<br>6 | 6.2590579<br>71 | 2.70E-05 |
| <i>hsa04723:Retrograde endocannabinoid signaling</i>                       | 13 | 6.701030<br>928 | 8.01E-0<br>6 | 5.0534428<br>44 | 2.72E-05 |
| <i>hsa04920:Adipocytokine signaling pathway</i>                            | 11 | 5.670103<br>093 | 8.94E-0<br>6 | 6.1696428<br>57 | 2.99E-05 |
| <i>hsa04722:Neurotrophin signaling pathway</i>                             | 14 | 7.216494<br>845 | 9.34E-0<br>6 | 4.5804924<br>24 | 3.07E-05 |
| <i>hsa04914:Progesterone-mediated oocyte maturation</i>                    | 12 | 6.185567<br>01  | 1.06E-0<br>5 | 5.4153605<br>02 | 3.43E-05 |
| <i>hsa04540:Gap junction</i>                                               | 12 | 6.185567<br>01  | 1.18E-0<br>5 | 5.3538223<br>14 | 3.77E-05 |
| <i>hsa05168:Herpes simplex infection</i>                                   | 17 | 8.762886<br>598 | 1.40E-0<br>5 | 3.6472305<br>02 | 4.39E-05 |
| <i>hsa04726:Serotonergic synapse</i>                                       | 13 | 6.701030<br>928 | 2.13E-0<br>5 | 4.5981777<br>23 | 6.59E-05 |
| <i>hsa05031:Amphetamine addiction</i>                                      | 10 | 5.154639<br>175 | 3.73E-0<br>5 | 5.9486914<br>6  | 1.14E-04 |
| <i>hsa04910:Insulin signaling pathway</i>                                  | 14 | 7.216494<br>845 | 4.23E-0<br>5 | 3.9830368<br>91 | 1.27E-04 |

|                                                        |    |             |          |             |          |
|--------------------------------------------------------|----|-------------|----------|-------------|----------|
| <i>hsa05231:Choline metabolism in cancer</i>           | 12 | 6.18556701  | 4.42E-05 | 4.664716472 | 1.31E-04 |
| <i>hsa04664:Fc epsilon RI signaling pathway</i>        | 10 | 5.154639175 | 4.75E-05 | 5.773729947 | 1.39E-04 |
| <i>hsa05203:Viral carcinogenesis</i>                   | 17 | 8.762886598 | 5.69E-05 | 3.255820399 | 1.65E-04 |
| <i>hsa04622:RIG-I-like receptor signaling pathway</i>  | 10 | 5.154639175 | 6.01E-05 | 5.608766234 | 1.72E-04 |
| <i>hsa04060:Cytokine-cytokine receptor interaction</i> | 18 | 9.278350515 | 6.59E-05 | 3.072628458 | 1.86E-04 |
| <i>hsa04062:Chemokine signaling pathway</i>            | 16 | 8.24742268  | 6.76E-05 | 3.377321603 | 1.88E-04 |
| <i>hsa05216:Thyroid cancer</i>                         | 7  | 3.608247423 | 7.09E-05 | 9.476880878 | 1.95E-04 |
| <i>hsa04923:Regulation of lipolysis in adipocytes</i>  | 9  | 4.639175258 | 7.26E-05 | 6.309862013 | 1.97E-04 |
| <i>hsa04022:cGMP-PKG signaling pathway</i>             | 15 | 7.731958763 | 7.30E-05 | 3.547713582 | 1.96E-04 |
| <i>hsa05032:Morphine addiction</i>                     | 11 | 5.670103093 | 9.16E-05 | 4.745879121 | 2.42E-04 |
| <i>hsa04912:GnRH signaling pathway</i>                 | 11 | 5.670103093 | 9.16E-05 | 4.745879121 | 2.42E-04 |
| <i>hsa04930:Type II diabetes mellitus</i>              | 8  | 4.12371134  | 1.82E-05 | 6.543560606 | 4.75E-04 |
| <i>hsa04913:Ovarian steroidogenesis</i>                | 8  | 4.12371134  | 2.07E-05 | 6.410018553 | 5.36E-04 |
| <i>hsa05211:Renal cell carcinoma</i>                   | 9  | 4.639175258 | 2.12E-05 | 5.436188811 | 5.42E-04 |
| <i>hsa04970:Salivary secretion</i>                     | 10 | 5.154639    | 3.00E-05 | 4.5652748   | 7.57E-04 |

|                                                        |    |          |         |           |          |
|--------------------------------------------------------|----|----------|---------|-----------|----------|
|                                                        |    | 175      | 4       | 41        |          |
| <i>hsa04261:Adrenergic signaling in cardiomyocytes</i> | 13 | 6.701030 | 3.08E-0 | 3.4958748 | 7.67E-04 |
| <i>hsa04728:Dopaminergic synapse</i>                   | 12 | 928      | 4       | 44        |          |
|                                                        |    | 6.185567 | 3.74E-0 | 3.6807528 | 9.22E-04 |
| <i>hsa05033:Nicotine addiction</i>                     | 7  | 01       | 4       | 41        |          |
|                                                        |    | 3.608247 | 4.54E-0 | 6.8707386 | 0.00110  |
| <i>hsa04150:mTOR signaling pathway</i>                 | 8  | 423      | 4       | 36        | 7733     |
|                                                        |    | 4.123711 | 5.99E-0 | 5.4153605 | 0.00144  |
| <i>hsa04921:Oxytocin signaling pathway</i>             | 13 | 34       | 4       | 02        | 4647     |
|                                                        |    | 6.701030 | 6.32E-0 | 3.2303653 | 0.00150  |
| <i>hsa05204:Chemical carcinogenesis</i>                | 9  | 928      | 4       | 62        | 6912     |
|                                                        |    | 4.639175 | 8.84E-0 | 4.4169034 | 0.00208  |
|                                                        |    | 258      | 4       | 09        | 3168     |

**Supplementary Table S4** TBI specific proteins

| Protein name                                       | Gene name | Protein name                                              | Gene name |
|----------------------------------------------------|-----------|-----------------------------------------------------------|-----------|
| <i>Nitric oxide synthase, inducible</i>            | NOS2      | <i>Ornithine decarboxylase</i>                            | ODC1      |
| <i>Prostaglandin G/H synthase 1</i>                | PTGS1     | <i>Xanthine dehydrogenase/oxidase</i>                     | XDH       |
| <i>Dopamine D1 receptor</i>                        | DRD1      | <i>Caspase-8</i>                                          | CASP8     |
| <i>Muscarinic acetylcholine receptor M3</i>        | CHRM3     | <i>DNA topoisomerase 1</i>                                | TOP1      |
| <i>Thrombin</i>                                    | F2        | <i>RAF proto-oncogene serine/threonine-protein kinase</i> | RAF1      |
| <i>Potassium voltage-gated channel subfamily H</i> | KCNH2     | <i>Superoxide dismutase [Cu-Zn]</i>                       | SOD1      |

*member 2*

|                                                         |        |                                                                      |         |
|---------------------------------------------------------|--------|----------------------------------------------------------------------|---------|
| <i>Muscarinic acetylcholine receptor M1</i>             | CHRM1  | <i>Protein kinase C alpha type</i>                                   | PRKCA   |
| <i>Estrogen receptor</i>                                | ESR1   | <i>Interstitial collagenase</i>                                      | MMP1    |
| <i>Androgen receptor</i>                                | AR     | <i>Hypoxia-inducible factor 1-alpha</i>                              | HIF1A   |
| <i>Beta-1 adrenergic receptor</i>                       | ADRB1  | <i>Signal transducer and activator of transcription 1-alpha/beta</i> | STAT1   |
| <i>Sodium channel protein type 5 subunit alpha</i>      | SCN5A  | <i>Protein CBFA2T1</i>                                               | RUNX1T1 |
| <i>Peroxisome proliferator activated receptor gamma</i> | PPARG  | <i>Probable E3 ubiquitin-protein ligase HERC5</i>                    | HERC5   |
| <i>Coagulation factor Xa</i>                            | F10    | <i>Cell division control protein 2 homolog</i>                       | CDK1    |
| <i>Muscarinic acetylcholine receptor M5</i>             | CHRM5  | <i>78 kDa glucose-regulated protein</i>                              | HSPA5   |
| <i>Prostaglandin G/H synthase 2</i>                     | PTGS2  | <i>Receptor tyrosine-protein kinase erbB-2</i>                       | ERBB2   |
| <i>Nitric-oxide synthase, endothelial</i>               | NOS3   | <i>Peroxisome proliferator-activated receptor gamma</i>              | PPARG   |
| <i>Alpha-2C adrenergic receptor</i>                     | ADRA2C | <i>Acetyl-CoA carboxylase 1</i>                                      | ACACA   |
| <i>Muscarinic acetylcholine receptor M4</i>             | CHRM4  | <i>Heme oxygenase 1</i>                                              | HMOX1   |
| <i>Retinoic acid receptor RXR-alpha</i>                 | RXRA   | <i>Cytochrome P450 3A4</i>                                           | CYP3A4  |

---

|                                   |        |                                   |        |
|-----------------------------------|--------|-----------------------------------|--------|
| <i>Delta-type opioid receptor</i> | OPRD1  | <i>Cytochrome P450 1A2</i>        | CYP1A2 |
| <i>CGMP-inhibited</i>             |        |                                   |        |
| <i>3',5'-cyclic</i>               | PDE3A  | <i>Caveolin-1</i>                 | CAV1   |
| <i>phosphodiesterase A</i>        |        |                                   |        |
| <i>5-hydroxytryptamine 2A</i>     | HTR2A  | <i>Myc proto-oncogene</i>         | MYC    |
| <i>receptor</i>                   |        | <i>protein</i>                    |        |
| <i>Alpha-1A adrenergic</i>        | ADRA1A | <i>Tissue factor</i>              | F3     |
| <i>receptor</i>                   |        |                                   |        |
| <i>Muscarinic acetylcholine</i>   | CHRM2  | <i>Gap junction alpha-1</i>       | GJA1   |
| <i>receptor M2</i>                |        | <i>protein</i>                    |        |
| <i>Alpha-1B adrenergic</i>        | ADRA1B | <i>Cytochrome P450 1A1</i>        | CYP1A1 |
| <i>receptor</i>                   |        |                                   |        |
| <i>Sodium-dependent</i>           | SLC6A3 | <i>Intercellular adhesion</i>     | ICAM1  |
| <i>dopamine transporter</i>       |        | <i>molecule 1</i>                 |        |
| <i>Beta-2 adrenergic</i>          | ADRB2  | <i>Interleukin-1 beta</i>         | IL1B   |
| <i>receptor</i>                   |        |                                   |        |
| <i>Alpha-1D adrenergic</i>        | ADRA1D | <i>C-C motif chemokine 2</i>      | CCL2   |
| <i>receptor</i>                   |        |                                   |        |
| <i>Sodium-dependent</i>           | SLC6A4 | <i>E-selectin</i>                 | SELE   |
| <i>serotonin transporter</i>      |        |                                   |        |
| <i>Estrogen receptor beta</i>     | ESRRB  | <i>Vascular cell adhesion</i>     | VCAM1  |
|                                   |        | <i>protein 1</i>                  |        |
| <i>Gamma-aminobutyric</i>         |        |                                   |        |
| <i>acid receptor subunit</i>      | GABRA1 | <i>Prostaglandin E2 receptor</i>  | PTGER3 |
| <i>alpha-1</i>                    |        | <i>EP3 subtype</i>                |        |
| <i>Dipeptidyl peptidase IV</i>    | DPP4   | <i>Interleukin-8</i>              | CXCL8  |
| <i>Mitogen-activated protein</i>  | MAPK14 | <i>Protein kinase C beta type</i> | PRKCB  |
| <i>kinase 14</i>                  |        |                                   |        |
| <i>Glycogen synthase</i>          | GSK3B  | <i>Baculoviral IAP</i>            | BIRC5  |

---



|                                                             |        |                                                      |          |
|-------------------------------------------------------------|--------|------------------------------------------------------|----------|
| <i>kinase-3 beta</i>                                        |        | <i>repeat-containing protein 5</i>                   |          |
| <i>Heat shock protein HSP 90</i>                            | HSP 90 | <i>Dual oxidase 2</i>                                | DUOX2    |
| <i>Cell division protein kinase 2</i>                       | CDK2   | <i>Nitric oxide synthase, endothelial</i>            | NOS3     |
| <i>Serine/threonine-protein kinase Chk1</i>                 | CHEK1  | <i>Heat shock protein beta-1</i>                     | HSPB1    |
| <i>mRNA of PKA Catalytic Subunit C-alpha</i>                | PRKACA | <i>Transforming growth factor beta-1</i>             | TGFB1    |
| <i>Retinoic acid receptor RXR-beta</i>                      | RXRB   | <i>Estrogen sulfotransferase</i>                     | SULT1E1  |
| <i>Trypsin-1</i>                                            | PRSS1  | <i>Maltase-glucoamylase, intestinal</i>              | MGAM     |
| <i>Proto-oncogene serine/threonine-protein kinase Pim-1</i> | PIM1   | <i>Interleukin-2</i>                                 | IL2      |
| <i>Cyclin-A2</i>                                            | CCNA2  | <i>Nuclear receptor subfamily 1 group 1 member 2</i> | NR2C2    |
| <i>Nuclear receptor coactivator 2</i>                       | NCOA2  | <i>Cytochrome P450 1B1</i>                           | CYP1B1   |
| <i>Calcium-activated potassium channel subunit alpha 1</i>  | KCNMA1 | <i>G2/mitotic-specific cyclin-B1</i>                 | CCNB1    |
| <i>Calmodulin</i>                                           | CALM   | <i>Tissue-type plasminogen activator</i>             | PLAT     |
| <i>Nitric oxide synthase, inducible</i>                     | NOS2   | <i>Thrombomodulin</i>                                | THBD     |
| <i>Prostaglandin G/H synthase 1</i>                         | PTGS1  | <i>Plasminogen activator inhibitor 1</i>             | SERPINE1 |

---

|                                                         |        |                                                                                                                          |        |
|---------------------------------------------------------|--------|--------------------------------------------------------------------------------------------------------------------------|--------|
| <i>Muscarinic acetylcholine receptor M1</i>             | CHRM1  | <i>Collagen alpha-1(I) chain</i>                                                                                         | COL1A1 |
| <i>Estrogen receptor</i>                                | ESR2   | <i>Interferon gamma</i>                                                                                                  | IFNG   |
| <i>Androgen receptor</i>                                | AR     | <i>Arachidonate 5-lipoxygenase</i>                                                                                       | ALOX5  |
| <i>Peroxisome proliferator activated receptor gamma</i> | PPARG  | <i>Phosphatidylinositol-3,4,5-t<br/>risphosphate 3-phosphatase<br/>and dual-specificity protein<br/>phosphatase PTEN</i> | PTEN   |
| <i>Prostaglandin G/H synthase 2</i>                     | PTGS2  | <i>Interleukin-1 alpha</i>                                                                                               | IL1A   |
| <i>Retinoic acid receptor RXR-alpha</i>                 | RXRA   | <i>Myeloperoxidase</i>                                                                                                   | MPO    |
| <i>CGMP-inhibited 3',5'-cyclic phosphodiesterase A</i>  | PDE3A  | <i>DNA topoisomerase 2-alpha</i>                                                                                         | TOP2A  |
| <i>Alpha-1A adrenergic receptor</i>                     | ADRA1A | <i>Neutrophil cytosol factor 1</i>                                                                                       | NCF1   |
| <i>Sodium-dependent dopamine transporter</i>            | SLC6A3 | <i>ATP-binding cassette sub-family G member 2</i>                                                                        | ABCG2  |
| <i>Beta-2 adrenergic receptor</i>                       | ADRB2  | <i>Hyaluronan synthase 2</i>                                                                                             | HAS2   |
| <i>Sodium-dependent serotonin transporter</i>           | SLC6A4 | <i>Glutathione S-transferase P</i>                                                                                       | GSTP1  |
| <i>Estrogen receptor beta</i>                           | MAOB   | <i>Nuclear factor erythroid 2-related factor 2</i>                                                                       | NFE2L2 |
| <i>Dipeptidyl peptidase IV</i>                          | DPP4   | <i>NAD(P)H dehydrogenase [quinone] 1</i>                                                                                 | NQO1   |
| <i>Mitogen-activated protein</i>                        | MAPK14 | <i>Poly [ADP-ribose]</i>                                                                                                 | PARP1  |

---

|                                 |        |                                    |        |
|---------------------------------|--------|------------------------------------|--------|
| <i>kinase 14</i>                |        | <i>polymerase 1</i>                |        |
| <i>Glycogen synthase</i>        | GSK3B  | <i>Aryl hydrocarbon receptor</i>   | AHR    |
| <i>kinase-3 beta</i>            |        |                                    |        |
| <i>Heat shock protein HSP</i>   |        | <i>26S proteasome</i>              |        |
| <i>90</i>                       | HSP90  | <i>non-ATPase regulatory</i>       | PSMD3  |
|                                 |        | <i>subunit 3</i>                   |        |
| <i>Cell division protein</i>    |        | <i>Solute carrier family 2,</i>    |        |
| <i>kinase 2</i>                 | CDK2   | <i>facilitated glucose</i>         | SLC2A4 |
|                                 |        | <i>transporter member 4</i>        |        |
| <i>Amine oxidase</i>            |        |                                    |        |
| <i>[flavin-containing] B</i>    | PKIA   | <i>Collagen alpha-1(III) chain</i> | COL3A1 |
| <i>Serine/threonine-protein</i> |        |                                    |        |
| <i>kinase Chk1</i>              | CHEK1  | <i>DNA gyrase subunit B</i>        | GYRB   |
| <i>mRNA of PKA Catalytic</i>    |        |                                    |        |
| <i>Subunit C-alpha</i>          | PRKACA | <i>C-X-C motif chemokine 11</i>    | CXCL11 |
| <i>Trypsin-1</i>                | PRSS1  | <i>C-X-C motif chemokine 2</i>     | CXCL2  |
| <i>Proto-oncogene</i>           |        |                                    |        |
| <i>serine/threonine-protein</i> | PIM1   | <i>DDB1- and</i>                   |        |
| <i>kinase Pim-1</i>             |        | <i>CUL4-associated factor 5</i>    | DCAF5  |
|                                 |        |                                    |        |
| <i>Cyclin-A2</i>                | CCNA2  | <i>Nuclear receptor subfamily</i>  |        |
|                                 |        | <i>1 group I member 3</i>          | NR1I3  |
| <i>Calmodulin</i>               | CALM   | <i>Serine/threonine-protein</i>    |        |
|                                 |        | <i>kinase Chk2</i>                 | CHEK2  |
| <i>cAMP-dependent protein</i>   |        |                                    |        |
| <i>kinase inhibitor alpha</i>   | ACHE   | <i>Insulin receptor</i>            | INSR   |
| <i>Thrombin</i>                 | F2     | <i>Claudin-4</i>                   | CLDN4  |
|                                 |        | <i>Peroxisome</i>                  |        |
| <i>Nitric-oxide synthase,</i>   | NOS3   | <i>proliferator-activated</i>      | PPARA  |
| <i>endothelial</i>              |        | <i>receptor alpha</i>              |        |

---

|                                                                                    |         |                                                                         |        |
|------------------------------------------------------------------------------------|---------|-------------------------------------------------------------------------|--------|
|                                                                                    |         | <i>Peroxisome</i>                                                       |        |
| <i>Acetylcholinesterase</i>                                                        | LACTB2  | <i>proliferator-activated<br/>receptor delta</i>                        | PPARD  |
| <i>Beta-lactamase</i>                                                              | JUN     | <i>Heat shock factor protein 1</i>                                      | HSF1   |
| <i>Transcription factor AP-1</i>                                                   | IL4     | <i>C-reactive protein</i>                                               | CRP    |
| <i>Peroxisome<br/>proliferator-activated<br/>receptor gamma</i>                    | PPARG   | <i>C-X-C motif chemokine 10</i>                                         | CXCL10 |
|                                                                                    |         | <i>Inhibitor of nuclear factor<br/>kappa-B kinase subunit<br/>alpha</i> |        |
| <i>Interleukin-4</i>                                                               | SIRT1   |                                                                         | CHUK   |
| <i>NAD-dependent<br/>deacetylase sirtuin-1</i>                                     | ATP5F1B | <i>Osteopontin</i>                                                      | SPP1   |
| <i>ATP synthase subunit<br/>beta, mitochondrial</i>                                | MT-ND6  | <i>Runt-related transcription<br/>factor 2</i>                          | RUNX2  |
| <i>NADH-ubiquinone<br/>oxidoreductase chain 6</i>                                  | HSD3B2  | <i>Ras association<br/>domain-containing protein<br/>1</i>              | RASSF1 |
| <i>3 beta-hydroxysteroid<br/>dehydrogenase/Delta<br/>5--&gt;4-isomerase type 2</i> | HSD3B1  | <i>Transcription factor E2F1</i>                                        | E2F1   |
| <i>3 beta-hydroxysteroid<br/>dehydrogenase/Delta<br/>5--&gt;4-isomerase type 1</i> | HTR3A   | <i>Transcription factor E2F2</i>                                        | E2F2   |
| <i>Cell division protein<br/>kinase 2</i>                                          | CDK2    | <i>Prostatic acid phosphatase</i>                                       | ACPP   |
| <i>Thrombin</i>                                                                    | F2      | <i>Cathepsin D</i>                                                      | CTSD   |
| <i>Glycogen synthase<br/>kinase-3 beta</i>                                         | GSK3B   | <i>Insulin-like growth<br/>factor-binding protein 3</i>                 | IGFBP3 |

---

|                                                    |        |                                                |        |
|----------------------------------------------------|--------|------------------------------------------------|--------|
| <i>Nitric oxide synthase, inducible</i>            | NOS2   | <i>Insulin-like growth factor II</i>           | IGF2   |
| <i>Prostaglandin G/H synthase 1</i>                | PTGS1  | <i>CD40 ligand</i>                             | CD40LG |
| <i>Muscarinic acetylcholine receptor M3</i>        | CHRNA7 | <i>Interferon regulatory factor 1</i>          | IRF1   |
| <i>Thrombin</i>                                    | F2     | <i>Receptor tyrosine-protein kinase erbB-3</i> | ERBB3  |
| <i>Muscarinic acetylcholine receptor M1</i>        | CHRM1  | <i>Serum paraoxonase/arylesterase 1</i>        | PON1   |
| <i>Estrogen receptor</i>                           | ESR1   | <i>Type I iodothyronine deiodinase</i>         | DIO1   |
| <i>Sodium channel protein type 5 subunit alpha</i> | SCN5A  | <i>Procollagen C-endopeptidase enhancer 1</i>  | PCOLCE |
| <i>Prostaglandin G/H synthase 2</i>                | PTGS2  | <i>Puromycin-sensitive aminopeptidase</i>      | NPEPPS |
| <i>5-hydroxytryptamine receptor 3A</i>             | NCOA1  | <i>Hexokinase-2</i>                            | HK2    |
| <i>Retinoic acid receptor RXR-alpha</i>            | PGR    | <i>Homeobox protein Nkx-3.1</i>                | NKX3-1 |
| <i>Acetylcholinesterase</i>                        | LACTB2 | <i>Ras GTPase-activating protein 1</i>         | RASA1  |
| <i>Alpha-1B adrenergic receptor</i>                | ADRA1B | <i>Peroxidase CIA</i>                          | PRXC1A |
| <i>Beta-2 adrenergic receptor</i>                  | ADRB2  | <i>Glutathione S-transferase Mu 1</i>          | GSTM1  |
| <i>Alpha-1D adrenergic receptor</i>                | ADRA1D | <i>Glutathione S-transferase Mu 2</i>          | GSTM2  |

---

|                                                               |        |                                                                                        |        |
|---------------------------------------------------------------|--------|----------------------------------------------------------------------------------------|--------|
| <i>Gamma-aminobutyric acid receptor subunit alpha-1</i>       | GABRA1 | <i>Nitric oxide synthase, inducible</i>                                                | NOS2   |
| <i>Heat shock protein HSP 90</i>                              | HSP 90 | <i>Prostaglandin G/H synthase 1</i>                                                    | PTGS1  |
| <i>Neuronal acetylcholine receptor protein, alpha-7 chain</i> | OPRM1  | <i>Androgen receptor</i>                                                               | AR     |
| <i>Trypsin-1</i>                                              | PRSS1  | <i>Peroxisome proliferator activated receptor gamma</i>                                | PPARG  |
| <i>Nuclear receptor coactivator 2</i>                         | NCOA2  | <i>Prostaglandin G/H synthase 2</i>                                                    | PTGS2  |
| <i>Nuclear receptor coactivator 1</i>                         | NCOA1  | <i>Heat shock protein HSP 90</i>                                                       | HSP 90 |
| <i>Calmodulin</i>                                             | CALM   | <i>Phosphatidylinositol-4,5-bisphosphate 3-kinase catalytic subunit, gamma isoform</i> | PIK3CG |
| <i>Muscarinic acetylcholine receptor M4</i>                   | CHRM4  | <i>mRNA of PKA Catalytic Subunit C-alpha</i>                                           | PRKACA |
| <i>Progesterone receptor</i>                                  | PGR    | <i>Nuclear receptor coactivator 2</i>                                                  | NCOA2  |
| <i>Nitric oxide synthase, inducible</i>                       | NOS2   | <i>Dipeptidyl peptidase IV</i>                                                         | DPP4   |
| <i>Prostaglandin G/H synthase 1</i>                           | PTGS1  | <i>Trypsin-1</i>                                                                       | PRSS1  |
| <i>Muscarinic acetylcholine receptor M3</i>                   | CHRNA7 | <i>Progesterone receptor</i>                                                           | PGR    |
| <i>Thrombin</i>                                               | F2     | <i>Thrombin</i>                                                                        | F2     |

---

|                                                    |        |                                                                |        |
|----------------------------------------------------|--------|----------------------------------------------------------------|--------|
| <i>Muscarinic acetylcholine receptor M1</i>        | CHRM1  | <i>Muscarinic acetylcholine receptor M1</i>                    | CHRM1  |
| <i>Estrogen receptor</i>                           | ESR1   | <i>Nitric-oxide synthase, endothelial</i>                      | NOS3   |
| <i>Beta-1 adrenergic receptor</i>                  | ADRB1  | <i>Gamma-aminobutyric-acid receptor alpha-2 subunit</i>        | GABRA2 |
| <i>Sodium channel protein type 5 subunit alpha</i> | SCN5A  | <i>Acetylcholinesterase</i>                                    | LACTB2 |
| <i>Prostaglandin G/H synthase 2</i>                | PTGS2  | <i>Sodium-dependent noradrenaline transporter</i>              | SLC6A2 |
| <i>Nitric-oxide synthase, endothelial</i>          | NOS3   | <i>Muscarinic acetylcholine receptor M2</i>                    | CHRM2  |
| <i>5-hydroxytryptamine receptor 3A</i>             | HTR3A  | <i>Alpha-1B adrenergic receptor</i>                            | ADRA1B |
| <i>Alpha-2C adrenergic receptor</i>                | ADRA2C | <i>Gamma-aminobutyric acid receptor subunit alpha-1</i>        | GABRA1 |
| <i>Retinoic acid receptor RXR-alpha</i>            | RXRA   | <i>DNA topoisomerase II</i>                                    | TOP2   |
| <i>Acetylcholinesterase CGMP-inhibited</i>         | LACTB2 | <i>Coagulation factor VII</i>                                  | F7     |
| <i>3',5'-cyclic phosphodiesterase A</i>            | PDE3A  | <i>Calmodulin</i>                                              | CALM   |
| <i>Alpha-1B adrenergic receptor</i>                | ADRA1B | <i>Transcription factor p65</i>                                | RELA   |
| <i>Beta-2 adrenergic receptor</i>                  | ADRB2  | <i>Inhibitor of nuclear factor kappa-B kinase subunit beta</i> | IKBKB  |
| <i>Alpha-1D adrenergic receptor</i>                | ADRA1D | <i>RAC-alpha serine/threonine-protein kinase</i>               | AKT1   |

---

|                                                         |        |                                                                      |        |
|---------------------------------------------------------|--------|----------------------------------------------------------------------|--------|
| <i>Mu-type opioid receptor</i>                          | OPRM1  | <i>Apoptosis regulator Bcl-2</i>                                     | BCL2   |
| <i>Gamma-aminobutyric acid receptor subunit alpha-1</i> | GABRA1 | <i>Apoptosis regulator BAX</i>                                       | BAX    |
| <i>Trypsin-1</i>                                        | PRSS1  | <i>Tumor necrosis factor</i>                                         | TNF    |
| <i>Nuclear receptor coactivator 2</i>                   | NCOA2  | <i>Transcription factor AP-1</i>                                     | IL4    |
| <i>Calmodulin</i>                                       | CALM   | <i>Activator of 90 kDa heat shock protein ATPase homolog 1</i>       | AHSA1  |
| <i>Nitric oxide synthase, inducible</i>                 | NOS2   | <i>Caspase-3</i>                                                     | CASP3  |
| <i>Prostaglandin G/H synthase 1</i>                     | PTGS1  | <i>Mitogen-activated protein kinase 8</i>                            | MAPK8  |
| <i>Androgen receptor</i>                                | AR     | <i>Xanthine dehydrogenase/oxidase</i>                                | XDH    |
| <i>Sodium channel protein type 5 subunit alpha</i>      | SCN5A  | <i>Interstitial collagenase</i>                                      | MMP1   |
| <i>Prostaglandin G/H synthase 2</i>                     | PTGS2  | <i>Signal transducer and activator of transcription 1-alpha/beta</i> | STAT1  |
| <i>Estrogen receptor beta</i>                           | MAOB   | <i>Cell division control protein 2 homolog</i>                       | CDK1   |
| <i>Dipeptidyl peptidase IV</i>                          | DPP4   | <i>Peroxisome proliferator-activated receptor gamma</i>              | PPARG  |
| <i>Heat shock protein HSP 90</i>                        | HSP 90 | <i>Heme oxygenase 1</i>                                              | HMOX1  |
| <i>Cell division protein</i>                            | CDK2   | <i>Cytochrome P450 3A4</i>                                           | CYP3A4 |

---



|                                                                  |        |                                                      |        |
|------------------------------------------------------------------|--------|------------------------------------------------------|--------|
| <i>kinase 2</i>                                                  |        |                                                      |        |
| <i>Serine/threonine-protein kinase Chk1</i>                      | CHEK1  | <i>Cytochrome P450 1A2</i>                           | CYP1A2 |
| <i>Trypsin-1</i>                                                 | PRSS1  | <i>Cytochrome P450 1A1</i>                           | CYP1A1 |
| <i>Nuclear receptor coactivator 2</i>                            | NCOA2  | <i>Intercellular adhesion molecule 1</i>             | ICAM1  |
| <i>Calmodulin</i>                                                | CALM   | <i>E-selectin</i>                                    | SELE   |
| <i>Nitric oxide synthase, inducible</i>                          | NOS2   | <i>Vascular cell adhesion protein 1</i>              | VCAM1  |
| <i>Prostaglandin G/H synthase 1</i>                              | PTGS1  | <i>Nuclear receptor subfamily 1 group 1 member 2</i> | NR2C2  |
| <i>Estrogen receptor</i>                                         | ESR1   | <i>Cytochrome P450 1B1</i>                           | CYP1B1 |
| <i>Androgen receptor</i>                                         | AR     | <i>Arachidonate 5-lipoxygenase</i>                   | ALOX5  |
| <i>Peroxisome proliferator activated receptor gamma</i>          | PPARG  | <i>Hyaluronan synthase 2</i>                         | HAS2   |
| <i>Prostaglandin G/H synthase 2</i>                              | PTGS2  | <i>Prostaglandin G/H synthase 2</i>                  | PTGS2  |
| <i>mRNA of Protein-tyrosine phosphatase, non-receptor type 1</i> | PTPN1  | <i>Retinoic acid receptor RXR-alpha</i>              | RXRA   |
| <i>Estrogen receptor beta</i>                                    | MAOB   | <i>Heat shock protein HSP 90</i>                     | HSP 90 |
| <i>Dipeptidyl peptidase IV</i>                                   | DPP4   | <i>Trypsin-1</i>                                     | PRSS1  |
| <i>Mitogen-activated protein kinase 14</i>                       | MAPK14 | <i>Progesterone receptor</i>                         | PGR    |
| <i>Glycogen synthase kinase-3 beta</i>                           | GSK3B  | <i>Nuclear receptor coactivator 2</i>                | NCOA2  |
| <i>Heat shock protein HSP 90</i>                                 | HSP 90 | <i>Muscarinic acetylcholine receptor M3</i>          | CHRNA7 |

---

|                                                                                        |        |                                                         |         |
|----------------------------------------------------------------------------------------|--------|---------------------------------------------------------|---------|
| <i>Cell division protein kinase 2</i>                                                  | CDK2   | <i>Muscarinic acetylcholine receptor M1</i>             | CHRM1   |
| <i>Phosphatidylinositol-4,5-bisphosphate 3-kinase catalytic subunit, gamma isoform</i> | PIK3CG | <i>Gamma-aminobutyric-acid receptor alpha-2 subunit</i> | GABRA2  |
| <i>mRNA of PKA Catalytic Subunit C-alpha</i>                                           | PRKACA | <i>Gamma-aminobutyric-acid receptor alpha-3 subunit</i> | GABRA3  |
| <i>Trypsin-1</i>                                                                       | PRSS1  | <i>Muscarinic acetylcholine receptor M2</i>             | CHRM2   |
| <i>Proto-oncogene serine/threonine-protein kinase Pim-1</i>                            | PIM1   | <i>Alpha-1B adrenergic receptor</i>                     | ADRA1B  |
| <i>Cyclin-A2</i>                                                                       | CCNA2  | <i>Gamma-aminobutyric acid receptor subunit alpha-1</i> | GABRA1  |
| <i>Nuclear receptor coactivator 2</i>                                                  | NCOA2  | <i>Glutamate receptor 2</i>                             | GRIA2   |
| <i>Calmodulin</i>                                                                      | CALM   | <i>Gamma-aminobutyric-acid receptor subunit alpha-6</i> | GABRA6  |
| <i>Glycogen phosphorylase, muscle form</i>                                             | PYGM   | <i>Gamma-aminobutyric-acid receptor alpha-5 subunit</i> | GABRA5  |
| <i>Peroxisome proliferator activated receptor delta</i>                                | PPARD  | <i>Ig gamma-1 chain C region</i>                        | IGHG1   |
| <i>Serine/threonine-protein kinase Chk1</i>                                            | CHEK1  | <i>Alcohol dehydrogenase 1B</i>                         | ALDH1B1 |
| <i>Aldose reductase</i>                                                                | AKR1B1 | <i>Alcohol dehydrogenase 1C</i>                         | ALDH3A1 |
| <i>Nuclear receptor coactivator 1</i>                                                  | NCOA1  | <i>Lysozyme</i>                                         | LYZ1    |
| <i>Coagulation factor VII</i>                                                          | F7     | <i>Nicotinate-nucleotide--dime</i>                      | COBT    |

---

|                                                         |        |                                                        |         |
|---------------------------------------------------------|--------|--------------------------------------------------------|---------|
|                                                         |        | <i>thylbenzimidazole</i>                               |         |
|                                                         |        | <i>phosphoribosyltransferase</i>                       |         |
| <i>Thrombin</i>                                         | F2     | <i>Prostaglandin G/H synthase 1</i>                    | PTGS1   |
| <i>Nitric-oxide synthase, endothelial</i>               | NOS3   | <i>Sodium channel protein type 5 subunit alpha</i>     | SCN5A   |
| <i>Acetylcholinesterase</i>                             | LACTB2 | <i>Prostaglandin G/H synthase 2</i>                    | PTGS2   |
| <i>Gamma-aminobutyric acid receptor subunit alpha-1</i> | GABRA1 | <i>Retinoic acid receptor RXR-alpha</i>                | RXRA    |
| <i>Amine oxidase [flavin-containing] B</i>              | PKIA   | <i>CGMP-inhibited 3',5'-cyclic phosphodiesterase A</i> | PDE3A   |
| <i>Glutamate receptor 2</i>                             | GRIA2  | <i>Sodium-dependent noradrenaline transporter</i>      | SLC6A2  |
| <i>Cytochrome P450-cam</i>                              | CAMC   | <i>Cytochrome P450-cam</i>                             | CYP21A2 |
| <i>Transcription factor p65</i>                         | RELA   | <i>Prostaglandin G/H synthase 2</i>                    | PTGS2   |
| <i>Xanthine dehydrogenase/oxidase</i>                   | XDH    | <i>DNA topoisomerase II</i>                            | TOP2    |
| <i>Neutrophil cytosol factor 1</i>                      | NCOA1  | <i>Nuclear receptor coactivator 2</i>                  | NCOA2   |
| <i>Oxidized low-density lipoprotein receptor 1</i>      | OLR1   | <i>Progesterone receptor</i>                           | PGR     |
| <i>DNA topoisomerase II</i>                             | TOP2   | <i>Prostaglandin G/H synthase 2</i>                    | PTGS2   |
| <i>Nitric oxide synthase, inducible</i>                 | NOS2   | <i>Vascular endothelial growth factor receptor 2</i>   | KDR     |
| <i>Prostaglandin G/H</i>                                | PTGS1  | <i>Hepatocyte growth factor</i>                        | MET     |

---

|                                  |        |                                     |        |
|----------------------------------|--------|-------------------------------------|--------|
| <i>synthase 1</i>                |        | <i>receptor</i>                     |        |
| <i>Estrogen receptor</i>         | ESR1   | <i>Heat shock protein HSP 90</i>    | HSP 90 |
|                                  |        | <i>Calcium-activated</i>            |        |
| <i>Androgen receptor</i>         | AR     | <i>potassium channel subunit</i>    | KCNMA1 |
|                                  |        | <i>alpha 1</i>                      |        |
| <i>Peroxisome proliferator</i>   |        | <i>Prostaglandin G/H synthase</i>   |        |
| <i>activated receptor gamma</i>  | PPARG  | <i>1</i>                            | PTGS1  |
| <i>Prostaglandin G/H</i>         |        | <i>DNA topoisomerase II</i>         |        |
| <i>synthase 2</i>                | PTGS2  |                                     | TOP2   |
| <i>Retinoic acid receptor</i>    |        | <i>Progesterone receptor</i>        |        |
| <i>RXR-alpha</i>                 | RXRA   |                                     | PGR    |
| <i>CGMP-inhibited</i>            |        | <i>Nuclear receptor</i>             |        |
| <i>3',5'-cyclic</i>              | PDE3A  | <i>coactivator 2</i>                | NCOA2  |
| <i>phosphodiesterase A</i>       |        | <i>Prostaglandin G/H synthase</i>   |        |
| <i>Estrogen receptor beta</i>    | MAOB   | <i>1</i>                            | PTGS1  |
|                                  |        | <i>Prostaglandin G/H synthase</i>   |        |
| <i>Dipeptidyl peptidase IV</i>   | DPP4   | <i>2</i>                            | PTGS2  |
| <i>Mitogen-activated protein</i> |        | <i>Heat shock protein HSP 90</i>    |        |
| <i>kinase 14</i>                 | MAPK14 |                                     | HSP 90 |
|                                  |        | <i>Phosphatidylinositol-4,5-bis</i> |        |
| <i>Glycogen synthase</i>         |        | <i>phosphate 3-kinase</i>           |        |
| <i>kinase-3 beta</i>             | GSK3B  | <i>catalytic subunit, gamma</i>     | PIK3CG |
|                                  |        | <i>isoform</i>                      |        |
| <i>Heat shock protein HSP</i>    |        | <i>Potassium voltage-gated</i>      |        |
| <i>90</i>                        | HSP 90 | <i>channel subfamily H</i>          | KCNH2  |
|                                  |        | <i>member 2</i>                     |        |
| <i>Cell division protein</i>     |        | <i>mRNA of PKA Catalytic</i>        |        |
| <i>kinase 2</i>                  | CDK2   | <i>Subunit C-alpha</i>              | PRKACA |

---

|                                                             |        |                                                         |        |
|-------------------------------------------------------------|--------|---------------------------------------------------------|--------|
| <i>Serine/threonine-protein kinase Chk1</i>                 | CHEK1  | <i>Dopamine D1 receptor</i>                             | DRD1   |
| <i>mRNA of PKA Catalytic Subunit C-alpha</i>                | PRKACA | <i>Muscarinic acetylcholine receptor M3</i>             | CHRNA7 |
| <i>Trypsin-1</i>                                            | PRSS1  | <i>Muscarinic acetylcholine receptor M1</i>             | CHRM1  |
| <i>Proto-oncogene serine/threonine-protein kinase Pim-1</i> | PIM1   | <i>Sodium channel protein type 5 subunit alpha</i>      | SCN5A  |
| <i>Cyclin-A2</i>                                            | CCNA2  | <i>Gamma-aminobutyric-acid receptor alpha-2 subunit</i> | GABRA2 |
| <i>Nuclear receptor coactivator 2</i>                       | NCOA2  | <i>Muscarinic acetylcholine receptor M4</i>             | CHRM4  |
| <i>Calmodulin</i>                                           | CALM   | <i>CGMP-inhibited 3',5'-cyclic phosphodiesterase A</i>  | PDE3A  |
| <i>Beta-2 adrenergic receptor</i>                           | ADRB2  | <i>5-hydroxytryptamine 2A receptor</i>                  | HTR2A  |
| <i>Prostaglandin G/H synthase 1</i>                         | PTGS1  | <i>Gamma-aminobutyric-acid receptor alpha-5 subunit</i> | GABRA5 |
| <i>Androgen receptor</i>                                    | AR     | <i>Alpha-1A adrenergic receptor</i>                     | ADRA1A |
| <i>Peroxisome proliferator activated receptor gamma</i>     | PPARG  | <i>Gamma-aminobutyric-acid receptor alpha-3 subunit</i> | GABRA3 |
| <i>Prostaglandin G/H synthase 2</i>                         | PTGS2  | <i>Muscarinic acetylcholine receptor M2</i>             | CHRM2  |
| <i>Heat shock protein HSP 90</i>                            | HSP 90 | <i>Alpha-1B adrenergic receptor</i>                     | ADRA1B |
| <i>Phosphatidylinositol-4,5-bisphosphate 3-kinase</i>       | PIK3CG | <i>Beta-2 adrenergic receptor</i>                       | ADRB2  |

---

|                                                             |        |                                                               |         |
|-------------------------------------------------------------|--------|---------------------------------------------------------------|---------|
| <i>catalytic subunit, gamma isoform</i>                     |        |                                                               |         |
| <i>Nuclear receptor coactivator 2</i>                       | NCOA2  | <i>Neuronal acetylcholine receptor subunit alpha-2</i>        | CHRNA2  |
| <i>Dipeptidyl peptidase IV</i>                              | DPP4   | <i>Sodium-dependent serotonin transporter</i>                 | SLC6A4  |
| <i>Aldose reductase</i>                                     | AKR1B1 | <i>Mu-type opioid receptor</i>                                | OPRM1   |
| <i>Trypsin-1</i>                                            | PRSS1  | <i>Gamma-aminobutyric acid receptor subunit alpha-1</i>       | GABRA1  |
| <i>DNA topoisomerase II</i>                                 | TOP2   | <i>Neuronal acetylcholine receptor protein, alpha-7 chain</i> | OPRM1   |
| <i>Thrombin</i>                                             | F2     | <i>Cytochrome P450-cam</i>                                    | CYP21A2 |
| <i>Potassium voltage-gated channel subfamily H member 2</i> | KCNH2  | <i>Apoptosis regulator Bcl-2</i>                              | BCL2    |
| <i>Sodium channel protein type 5 subunit alpha</i>          | SCN5A  | <i>Apoptosis regulator BAX</i>                                | BAX     |
| <i>Coagulation factor Xa</i>                                | F10    | <i>Caspase-9</i>                                              | CASP9   |
| <i>Beta-2 adrenergic receptor</i>                           | ADRB2  | <i>Transcription factor AP-1</i>                              | IL4     |
| <i>Stromelysin-1</i>                                        | MMP3   | <i>Caspase-3</i>                                              | CASP3   |
| <i>mRNA of PKA Catalytic Subunit C-alpha</i>                | PRKACA | <i>Caspase-8</i>                                              | CASP8   |
| <i>Coagulation factor VII</i>                               | F7     | <i>Protein kinase C alpha type</i>                            | PRKCA   |
| <i>Nitric-oxide synthase, endothelial</i>                   | NOS3   | <i>Transforming growth factor beta-1</i>                      | TGFB1   |
| <i>Retinoic acid receptor RXR-alpha</i>                     | RXRA   | <i>Serum paraoxonase/arylesterase 1</i>                       | PON1    |

---

|                                                         |        |                                                   |        |
|---------------------------------------------------------|--------|---------------------------------------------------|--------|
| <i>Acetylcholinesterase</i>                             | LACTB2 | <i>Microtubule-associated protein 2</i>           | MAP2   |
| <i>Gamma-aminobutyric acid receptor subunit alpha-1</i> | GABRA1 | <i>Progesterone receptor</i>                      | PGR    |
| <i>Amine oxidase [flavin-containing] B</i>              | PKIA   | <i>Mineralocorticoid receptor</i>                 | NR3C2  |
| <i>Transcription factor p65</i>                         | RELA   | <i>Nuclear receptor coactivator 2</i>             | NCOA2  |
| <i>Epidermal growth factor receptor</i>                 | EGFR   | <i>Alcohol dehydrogenase 1C</i>                   | ADH1C  |
| <i>RAC-alpha serine/threonine-protein kinase</i>        | AKT1   | <i>Ig gamma-1 chain C region</i>                  | IGHG1  |
| <i>Vascular endothelial growth factor A</i>             | VEGFA  | <i>Retinoic acid receptor RXR-alpha</i>           | RXRA   |
| <i>G1/S-specific cyclin-D1</i>                          | CCND1  | <i>Nuclear receptor coactivator 1</i>             | NCOA1  |
| <i>Apoptosis regulator Bcl-2</i>                        | BCL2   | <i>Prostaglandin G/H synthase 1</i>               | PTGS1  |
| <i>Bcl-2-like protein 1</i>                             | BCL2L1 | <i>Prostaglandin G/H synthase 2</i>               | PTGS2  |
| <i>Proto-oncogene c-Fos</i>                             | FOS    | <i>Alpha-2A adrenergic receptor</i>               | ADRA2A |
| <i>Cyclin-dependent kinase inhibitor 1</i>              | CDKN1  | <i>Sodium-dependent noradrenaline transporter</i> | SLC6A2 |
| <i>Eukaryotic translation initiation factor 6</i>       | EIF6   | <i>Sodium-dependent dopamine transporter</i>      | SLC6A3 |
| <i>Apoptosis regulator BAX</i>                          | BAX    | <i>Beta-2 adrenergic receptor</i>                 | ADRB2  |

|                                                                        |        |                                                         |        |
|------------------------------------------------------------------------|--------|---------------------------------------------------------|--------|
| <i>Caspase-9</i>                                                       | CASP9  | <i>Aldose reductase</i>                                 | AKR1B1 |
| <i>Urokinase-type plasminogen activator 72 kDa type IV collagenase</i> | PLAU   | <i>Urokinase-type plasminogen activator</i>             | PLAU   |
| <i>Matrix metalloproteinase-9</i>                                      | MMP2   | <i>Leukotriene A-4 hydrolase</i>                        | LTA4H  |
| <i>Mitogen-activated protein kinase 1</i>                              | MMP9   | <i>Amine oxidase [flavin-containing] B</i>              | PKIA   |
| <i>Interleukin-10</i>                                                  | MAPK1  | <i>Amine oxidase [flavin-containing] A</i>              | MAOA   |
| <i>Pro-epidermal growth factor</i>                                     | IL10   | <i>mRNA of PKA Catalytic Subunit C-alpha</i>            | PRKACA |
| <i>Retinoblastoma-associated protein</i>                               | EGF    | <i>Chymotrypsinogen B</i>                               | CTRB1  |
| <i>Tumor necrosis factor</i>                                           | RB1    | <i>Muscarinic acetylcholine receptor M3</i>             | CHRNA7 |
| <i>Transcription factor AP-1</i>                                       | TNF    | <i>Muscarinic acetylcholine receptor M1</i>             | CHRM1  |
| <i>Interleukin-6</i>                                                   | IL4    | <i>Beta-1 adrenergic receptor</i>                       | ADRB1  |
| <i>Cyclin-dependent kinase inhibitor 2A, isoforms 1/2/3</i>            | IL6    | <i>Sodium channel protein type 5 subunit alpha</i>      | SCN5A  |
| <i>Activator of 90 kDa heat shock protein ATPase homolog 1</i>         | CDKN2A | <i>5-hydroxytryptamine 2A receptor</i>                  | HTR2A  |
| <i>Caspase-3</i>                                                       | AHSA1  | <i>Alpha-1A adrenergic receptor</i>                     | ADRA1A |
| <i>Cellular tumor antigen</i>                                          | CASP3  | <i>Gamma-aminobutyric-acid receptor alpha-3 subunit</i> | GABRA3 |
|                                                                        | TP53   | <i>Muscarinic acetylcholine</i>                         | CHRM2  |

---



|                                            |        |                                                               |        |
|--------------------------------------------|--------|---------------------------------------------------------------|--------|
| <i>p53</i>                                 |        | <i>receptor M2</i>                                            |        |
| <i>ETS domain-containing protein Elk-1</i> | ELK1   | <i>Alpha-1B adrenergic receptor</i>                           | ADRA1B |
| <i>NF-kappa-B inhibitor alpha</i>          | NFKBIA | <i>Gamma-aminobutyric acid receptor subunit alpha-1</i>       | GABRA1 |
| <i>NADPH--cytochrome P450 reductase</i>    | POR    | <i>Neuronal acetylcholine receptor protein, alpha-7 chain</i> | OPRM1  |

**Supplementary Table S5** 89 signal pathways related to AR-RAS for treating TBI

| Term                                    | Count | %      | P-Value  | Fold Enrichment | Benjamini t |
|-----------------------------------------|-------|--------|----------|-----------------|-------------|
| <i>hsa05161:Hepatitis B</i>             | 11    | 34.375 | 1.73E-10 | 17.47356322     | 2.82E-08    |
| <i>hsa05145:Toxoplasmosis</i>           | 10    | 31.25  | 6.83E-10 | 19.51977401     | 5.57E-08    |
| <i>hsa05200:Pathways in cancer</i>      | 13    | 40.625 | 2.08E-08 | 7.619168787     | 1.13E-06    |
| <i>hsa05152:Tuberculosis</i>            | 10    | 31.25  | 2.50E-08 | 13.01318267     | 1.02E-06    |
| <i>hsa04066:HIF-1 signaling pathway</i> | 8     | 25     | 1.12E-07 | 18.80272109     | 3.67E-06    |
| <i>hsa05164:Influenza A</i>             | 9     | 28.125 | 3.76E-07 | 11.9137931      | 1.02E-05    |
| <i>hsa04071:Sphingolipid</i>            | 8     | 25     | 4.54E-07 | 15.355555       | 1.06E-05    |

|                               |    |       |          |           |          |
|-------------------------------|----|-------|----------|-----------|----------|
| <i>signaling pathway</i>      |    |       |          | 56        |          |
| <i>hsa04010:MAPK</i>          | 10 | 31.25 | 5.78E-07 | 9.0326797 | 1.18E-05 |
| <i>signaling pathway</i>      |    |       |          | 39        |          |
| <i>hsa05223:Non-small</i>     | 6  | 18.75 | 2.98E-06 | 24.678571 | 5.40E-05 |
| <i>cell lung cancer</i>       |    |       |          | 43        |          |
| <i>hsa04150:mTOR</i>          | 6  | 18.75 | 3.56E-06 | 23.827586 | 5.80E-05 |
| <i>signaling pathway</i>      |    |       |          | 21        |          |
| <i>hsa05142:Chagas</i>        | 7  | 21.87 | 3.61E-06 | 15.503205 | 5.34E-05 |
| <i>disease (American</i>      |    | 5     |          | 13        |          |
| <i>trypanosomiasis)</i>       |    |       |          |           |          |
| <i>hsa04210:Apoptosis</i>     | 6  | 18.75 | 4.97E-06 | 22.290322 | 6.75E-05 |
|                               |    |       |          | 58        |          |
| <i>hsa05210:Colorectal</i>    | 6  | 18.75 | 4.97E-06 | 22.290322 | 6.75E-05 |
| <i>cancer</i>                 |    |       |          | 58        |          |
| <i>hsa04725:Cholinergic</i>   | 7  | 21.87 | 5.27E-06 | 14.525525 | 6.61E-05 |
| <i>synapse</i>                |    | 5     |          | 53        |          |
| <i>hsa05212:Pancreatic</i>    | 6  | 18.75 | 6.29E-06 | 21.261538 | 7.32E-05 |
| <i>cancer</i>                 |    |       |          | 46        |          |
| <i>hsa04380:Osteoclast</i>    | 7  | 21.87 | 1.37E-05 | 12.307888 | 1.49E-04 |
| <i>differentiation</i>        |    | 5     |          | 04        |          |
| <i>hsa05205:Proteoglycans</i> | 8  | 25    | 1.39E-05 | 9.2133333 | 1.42E-04 |
| <i>in cancer</i>              |    |       |          | 33        |          |
| <i>hsa05160:Hepatitis C</i>   | 7  | 21.87 | 1.50E-05 | 12.122807 | 1.44E-04 |
|                               |    | 5     |          | 02        |          |
| <i>hsa04012:ErbB</i>          | 6  | 18.75 | 2.64E-05 | 15.885057 | 2.39E-04 |
| <i>signaling pathway</i>      |    |       |          | 47        |          |
| <i>hsa05215:Prostate</i>      | 6  | 18.75 | 2.79E-05 | 15.704545 | 2.39E-04 |
| <i>cancer</i>                 |    |       |          | 45        |          |
| <i>hsa04014:Ras signaling</i> | 8  | 25    | 3.08E-05 | 8.1533923 | 2.51E-04 |

---

|                                                           |   |            |          |                 |          |
|-----------------------------------------------------------|---|------------|----------|-----------------|----------|
| <i>pathway</i>                                            |   |            |          | 3               |          |
| <i>hsa04932:Non-alcoholic fatty liver disease (NAFLD)</i> | 7 | 21.87<br>5 | 3.09E-05 | 10.677704<br>19 | 2.40E-04 |
| <i>hsa04660:T cell receptor signaling pathway</i>         | 6 | 18.75      | 5.96E-05 | 13.417475<br>73 | 4.42E-04 |
| <i>hsa05146:Amoebiasis</i>                                | 6 | 18.75      | 6.85E-05 | 13.037735<br>85 | 4.85E-04 |
| <i>hsa04668:TNF signaling pathway</i>                     | 6 | 18.75      | 6.85E-05 | 13.037735<br>85 | 4.85E-04 |
| <i>hsa04620:Toll-like receptor signaling pathway</i>      | 6 | 18.75      | 6.85E-05 | 13.037735<br>85 | 4.85E-04 |
| <i>hsa04931:Insulin resistance</i>                        | 6 | 18.75      | 7.49E-05 | 12.796296<br>3  | 5.08E-04 |
| <i>hsa04020:Calcium signaling pathway</i>                 | 7 | 21.87<br>5 | 8.04E-05 | 9.0074487<br>9  | 5.24E-04 |
| <i>hsa04919:Thyroid hormone signaling pathway</i>         | 6 | 18.75      | 9.69E-05 | 12.122807<br>02 | 6.07E-04 |
| <i>hsa04370:VEGF signaling pathway</i>                    | 5 | 15.62<br>5 | 1.11E-04 | 18.879781<br>42 | 6.68E-04 |
| <i>hsa04650:Natural killer cell mediated cytotoxicity</i> | 6 | 18.75      | 1.34E-04 | 11.327868<br>85 | 7.78E-04 |
| <i>hsa05214:Glioma</i>                                    | 5 | 15.62<br>5 | 1.42E-04 | 17.717948<br>72 | 7.98E-04 |
| <i>hsa04728:Dopaminergic</i>                              | 6 | 18.75      | 1.68E-04 | 10.796875       | 9.10E-04 |

---

|                                |   |       |           |           |            |
|--------------------------------|---|-------|-----------|-----------|------------|
| <i>synapse</i>                 |   |       |           |           |            |
| <i>hsa04664:Fc epsilon RI</i>  | 5 | 15.62 | 1.69E-04  | 16.936274 | 8.90E-04   |
| <i>signaling pathway</i>       |   | 5     |           | 51        |            |
| <i>hsa04510:Focal</i>          | 7 | 21.87 | 1.75E-04  | 7.8268608 | 8.89E-04   |
| <i>adhesion</i>                |   | 5     |           | 41        |            |
| <i>hsa05140:Leishmaniasis</i>  | 5 | 15.62 | 2.00E-04  | 16.220657 | 9.89E-04   |
|                                |   | 5     |           | 28        |            |
| <i>hsa04261:Adrenergic</i>     |   |       |           | 9.4657534 | 0.00148579 |
| <i>signaling in</i>            | 6 | 18.75 | 3.10E-04  | 25        | 7          |
| <i>cardiomyocytes</i>          |   |       |           |           |            |
| <i>hsa05143:African</i>        | 4 | 12.5  | 3.33E-04  | 27.919191 | 0.00155098 |
| <i>trypanosomiasis</i>         |   |       |           | 92        | 7          |
| <i>hsa04151:PI3K-Akt</i>       | 8 | 25    | 4.37E-04  | 5.3410628 | 0.00197887 |
| <i>signaling pathway</i>       |   |       |           | 02        | 4          |
| <i>hsa04540:Gap junction</i>   | 5 | 15.62 | 4.57E-04  | 13.087121 | 0.00201339 |
|                                |   | 5     |           | 21        |            |
| <i>hsa05231:Choline</i>        | 5 | 15.62 | 7.71E-04  | 11.402640 | 0.00330393 |
| <i>metabolism in cancer</i>    |   | 5     |           | 26        | 3          |
| <i>hsa05168:Herpes</i>         | 6 | 18.75 | 8.73E-04  | 7.5519125 | 0.00364565 |
| <i>simplex infection</i>       |   |       |           | 68        |            |
| <i>hsa05206:MicroRNAs in</i>   | 7 | 21.87 | 9.94E-04  | 5.6573099 | 0.00404379 |
| <i>cancer</i>                  |   | 5     |           | 42        | 9          |
| <i>hsa05014:Amyotrophic</i>    | 4 | 12.5  | 0.0011410 | 18.426666 | 0.00452886 |
| <i>lateral sclerosis (ALS)</i> |   |       | 97        | 67        | 2          |
| <i>hsa05213:Endometrial</i>    | 4 | 12.5  | 0.0012794 | 17.717948 | 0.00495621 |
| <i>cancer</i>                  |   |       | 18        | 72        | 5          |
| <i>hsa04270:Vascular</i>       |   |       |           |           |            |
| <i>smooth muscle</i>           | 5 | 15.62 | 0.0014236 | 9.6778711 | 0.00538603 |
| <i>contraction</i>             |   | 5     | 82        | 48        | 8          |

---

|                                                     |   |       |           |           |            |
|-----------------------------------------------------|---|-------|-----------|-----------|------------|
| <i>hsa04722:Neurotrophin signaling pathway</i>      | 5 | 15.62 | 0.0014685 | 9.5972222 | 0.00542938 |
|                                                     |   | 5     | 13        | 22        |            |
| <i>hsa04621:NOD-like receptor signaling pathway</i> | 4 | 12.5  | 0.0015060 | 16.751515 | 0.00544439 |
|                                                     |   |       | 24        | 15        | 1          |
| <i>hsa04068:FoxO signaling pathway</i>              | 5 | 15.62 | 0.0022042 | 8.5945273 | 0.00778895 |
|                                                     |   | 5     | 82        | 63        | 6          |
| <i>hsa05321:Inflammatory bowel disease (IBD)</i>    | 4 | 12.5  | 0.0023319 | 14.395833 | 0.00806398 |
|                                                     |   |       |           | 33        | 2          |
| <i>hsa04910:Insulin signaling pathway</i>           | 5 | 15.62 | 0.0024541 | 8.3454106 | 0.00830949 |
|                                                     |   | 5     | 75        | 28        | 5          |
| <i>hsa05031:Amphetamine addiction</i>               | 4 | 12.5  | 0.0025467 | 13.959595 | 0.00844686 |
|                                                     |   |       | 79        | 96        | 8          |
| <i>hsa04662:B cell receptor signaling pathway</i>   | 4 | 12.5  | 0.0028914 | 13.352657 | 0.00939550 |
|                                                     |   |       | 92        |           | 3          |
| <i>hsa04917:Prolactin signaling pathway</i>         | 4 | 12.5  | 0.0031365 | 12.976525 | 0.00999017 |
|                                                     |   |       | 49        | 82        | 4          |
| <i>hsa05220:Chronic myeloid leukemia</i>            | 4 | 12.5  | 0.0032637 | 12.796296 | 0.01019494 |
|                                                     |   |       | 31        | 3         | 7          |
| <i>hsa04921:Oxytocin signaling pathway</i>          | 5 | 15.62 | 0.0040021 | 7.2890295 | 0.01225734 |
|                                                     |   | 5     | 15        | 36        | 5          |
| <i>hsa04022:cGMP-PKG signaling pathway</i>          | 5 | 15.62 | 0.0047735 | 6.9377510 | 0.01433969 |
|                                                     |   | 5     | 35        | 04        | 8          |
| <i>hsa05010:Alzheimer's disease</i>                 | 5 | 15.62 | 0.0049810 | 6.8551587 | 0.01468990 |
|                                                     |   | 5     | 37        | 3         | 4          |
| <i>hsa04666:Fc gamma R-mediated phagocytosis</i>    | 4 | 12.5  | 0.0050413 | 10.968253 | 0.01460350 |
|                                                     |   |       | 99        | 97        | 4          |

---

|                                                                    |   |            |                 |                 |                 |
|--------------------------------------------------------------------|---|------------|-----------------|-----------------|-----------------|
| <i>hsa04350:TGF-beta<br/>signaling pathway</i>                     | 4 | 12.5       | 0.0050413<br>99 | 10.968253<br>97 | 0.01460350<br>4 |
| <i>hsa04970:Salivary<br/>secretion</i>                             | 4 | 12.5       | 0.0053843<br>97 | 10.713178<br>29 | 0.01532051<br>7 |
| <i>hsa04912:GnRH<br/>signaling pathway</i>                         | 4 | 12.5       | 0.0063025<br>71 | 10.124542<br>12 | 0.01761152<br>3 |
| <i>hsa04062:Chemokine<br/>signaling pathway</i>                    | 5 | 15.62<br>5 | 0.0071289<br>99 | 6.1917562<br>72 | 0.01957184<br>4 |
| <i>hsa05169:Epstein-Barr<br/>virus infection</i>                   | 5 | 15.62<br>5 | 0.0076782<br>62 | 6.0614035<br>09 | 0.02072205<br>7 |
| <i>hsa04915:Estrogen<br/>signaling pathway</i>                     | 4 | 12.5       | 0.0079566<br>12 | 9.3063973<br>06 | 0.02111992<br>9 |
| <i>hsa04916:Melanogenesi<br/>s</i>                                 | 4 | 12.5       | 0.0081797<br>19 | 9.2133333<br>33 | 0.02136171<br>5 |
| <i>hsa04015:Rap1<br/>signaling pathway</i>                         | 5 | 15.62<br>5 | 0.0108472<br>76 | 5.4841269<br>84 | 0.02782407<br>8 |
| <i>hsa04726:Serotonergic<br/>synapse</i>                           | 4 | 12.5       | 0.0108799<br>79 | 8.3003003       | 0.02747723<br>1 |
| <i>hsa04960:Aldosterone-r<br/>egulated sodium<br/>reabsorption</i> | 3 | 9.375      | 0.0114478<br>42 | 17.717948<br>72 | 0.02846040<br>2 |
| <i>hsa05219:Bladder<br/>cancer</i>                                 | 3 | 9.375      | 0.0126029<br>47 | 16.853658<br>54 | 0.03083776<br>9 |
| <i>hsa04930:Type II<br/>diabetes mellitus</i>                      | 3 | 9.375      | 0.0170259<br>18 | 14.395833<br>33 | 0.04091726<br>4 |
| <i>hsa05162:Measles</i>                                            | 4 | 12.5       | 0.0176784<br>13 | 6.9273182<br>96 | 0.04185412<br>5 |
| <i>hsa05144:Malaria</i>                                            | 3 | 9.375      | 0.0177046<br>52 | 14.102040<br>82 | 0.04132073      |

---

|                                 |   |       |           |           |            |
|---------------------------------|---|-------|-----------|-----------|------------|
| <i>hsa05166:HTLV-I</i>          | 5 | 15.62 | 0.0210824 | 4.4986979 | 0.04840608 |
| <i>infection</i>                |   | 5     | 59        | 17        | 2          |
| <i>hsa05134:Legionellosis</i>   | 3 | 9.375 | 0.0212675 | 12.796296 | 0.04815409 |
|                                 |   |       | 23        | 3         | 3          |
| <i>hsa05221:Acute myeloid</i>   | 3 | 9.375 | 0.0227697 | 12.339285 | 0.05080799 |
| <i>leukemia</i>                 |   |       | 75        | 71        | 3          |
| <i>hsa04730:Long-term</i>       | 3 | 9.375 | 0.0259021 | 11.516666 | 0.05691471 |
| <i>depression</i>               |   |       | 59        | 67        | 6          |
| <i>hsa05230:Central</i>         |   |       | 0.0291999 |           | 0.06319166 |
| <i>carbon metabolism in</i>     | 3 | 9.375 |           | 10.796875 |            |
| <i>cancer</i>                   |   |       | 56        |           | 1          |
| <i>hsa05211:Renal cell</i>      | 3 | 9.375 | 0.0300495 | 10.630769 | 0.06415837 |
| <i>carcinoma</i>                |   |       | 46        | 23        | 8          |
| <i>hsa04720:Long-term</i>       | 3 | 9.375 | 0.0309090 | 10.469696 | 0.06512065 |
| <i>potentiation</i>             |   |       | 07        | 97        | 8          |
| <i>hsa05120:Epithelial cell</i> |   |       |           |           |            |
| <i>signaling in</i>             | 3 | 9.375 | 0.0317782 | 10.313432 | 0.06607851 |
| <i>Helicobacter pylori</i>      |   |       | 48        | 84        | 8          |
| <i>infection</i>                |   |       |           |           |            |
| <i>hsa04610:Complement</i>      |   |       | 0.0335457 | 10.014492 |            |
| <i>and coagulation</i>          | 3 | 9.375 |           |           | 0.06882189 |
| <i>cascades</i>                 |   |       | 06        | 75        |            |
| <i>hsa04622:RIG-I-like</i>      |   |       | 0.0344437 | 9.8714285 | 0.06976704 |
| <i>receptor signaling</i>       | 3 | 9.375 |           |           |            |
| <i>pathway</i>                  |   |       | 42        | 71        | 4          |
| <i>hsa04920:Adipocytokine</i>   | 3 | 9.375 | 0.0344437 | 9.8714285 | 0.06976704 |
| <i>signaling pathway</i>        |   |       | 42        | 71        | 4          |
| <i>hsa05218:Melanoma</i>        | 3 | 9.375 | 0.0353511 | 9.7323943 | 0.07070777 |
|                                 |   |       | 97        | 66        | 1          |

---

|                                            |   |       |                 |                 |                 |
|--------------------------------------------|---|-------|-----------------|-----------------|-----------------|
| <i>hsa04520:Adherens<br/>junction</i>      | 3 | 9.375 | 0.0353511<br>97 | 9.7323943<br>66 | 0.07070777<br>1 |
| <i>hsa05133:Pertussis</i>                  | 3 | 9.375 | 0.0390734<br>35 | 9.2133333<br>33 | 0.07707438<br>7 |
| <i>hsa04911:Insulin<br/>secretion</i>      | 3 | 9.375 | 0.0489957<br>22 | 8.1294117<br>65 | 0.09503661<br>4 |
| <i>hsa05222:Small cell<br/>lung cancer</i> | 3 | 9.375 | 0.0489957<br>22 | 8.1294117<br>65 | 0.09503661<br>4 |

---
